1 **TITLE**

2 **Massive rhizobial genomic variations associated with partner quality in *Lotus*–**

3 ***Mesorhizobium* symbiosis**

4

5 **AUTHORS**

6 Masaru Bamba<sup>1\*</sup>, Seishiro Aoki<sup>2</sup>, Tadashi Kajita<sup>3</sup>, Hiroaki Setoguchi<sup>4</sup>, Yasuyuki Watano<sup>5</sup>,

7 Shusei Sato<sup>6</sup>, and Takashi Tsuchimatsu<sup>5\*</sup>

8

9 **AFFILIATIONS AND ADDRESSES**

10 <sup>1</sup> Department of Biology (Frontier Science Program), Graduate School of Science and  
11 Engineering, Chiba University, 1-33 Yayoi, Inage, Chiba 263-8522, Japan

12 <sup>2</sup> Department of Biological Sciences, Graduate School of Science, The University of  
13 Tokyo, 2-11-16 Yayoi, Bunkyo-ku, Tokyo 113-0032, Japan

14 <sup>3</sup> Iriomote Station, Tropical Biosphere Research Center, the University of Ryukyus, 870  
15 Uehara, Taketomi-cho, Yaeyama-gun, Okinawa 907-1541, Japan

16 <sup>4</sup> Graduate School of Human and Environmental Studies, Kyoto University,  
17 Yoshidanihonmatsu-cho, Sakyo-ku, Kyoto 606-8501 Japan

18 <sup>5</sup> Department of Biology, Graduate School of Science, Chiba University, 1-33 Yayoi,  
19 Inage, Chiba 263-8522, Japan

20 <sup>6</sup> Graduate School of Life Sciences, Tohoku University, 2-1-1 Katahira, Aoba, Sendai  
21 980-8577, Japan

22

23 **CORRESPONDING AUTHORS**

24 Takashi Tsuchimatsu: [takashi@chiba-u.jp](mailto:takashi@chiba-u.jp)

25 Masaru Bamba: [contact2093@gmail.com](mailto:contact2093@gmail.com)

26

27 **KEYWORDS**

28 Legume–rhizobia mutualism, whole-genome sequencing, partner quality variation,

29 horizontal gene transfer

30 **ABSTRACT**

31 In diverse mutualistic relationships, genetic variations in impact on the growth of  
32 interacting partners—variations in partner quality—are common, despite the theoretical  
33 prediction that selection favoring high-quality partners should eliminate such variations.  
34 Here, we investigated how variations in partner quality could be maintained in the  
35 nitrogen-fixing mutualism between *Lotus japonicus* and *Mesorhizobium* bacteria. We  
36 reconstructed *de novo* assembled full-genome sequences from nine rhizobial symbionts,  
37 finding massive variations in the core genome and the contrastingly similar symbiotic  
38 islands, indicating recent horizontal gene transfer (HGT) of the symbiosis islands into  
39 diverse *Mesorhizobium* lineages. A cross-inoculation experiment using nine sequenced  
40 rhizobial symbionts and 15 *L. japonicus* accessions revealed extensive quality variations  
41 represented by plant growth phenotypes, including genotype-by-genotype interactions.  
42 Quality variations were not associated with the presence/absence variations of known  
43 symbiosis-related genes in the symbiosis island, but rather, showed significant  
44 correlations with the core genome variations, supported by SNP- and kinship matrix-  
45 based association analyses. These findings highlight the novel role of HGT of symbiosis  
46 islands, which indirectly supply mutations of core genomes into *L. japonicus*-associated  
47 bacteria, thereby contributing to the maintenance of variations in partner quality.

## 48 INTRODUCTION

49 While mutualistic symbiotic relationships—unlike organisms living together and  
50 establishing a cooperative interaction—are ubiquitous in nature, it remains unclear how  
51 mutualistic interactions originated and how they are evolutionarily maintained.  
52 Evolutionary theory predicts that mutualism might be unstable because natural selection  
53 would favor mutualists that optimize their fitness by minimizing the costs of returning  
54 benefits to a partner (Frederickson 2013; Ghoul *et al.* 2013). Therefore, the stabilizing  
55 mechanisms that prevent the invasion of low-quality partners have been a major focus  
56 of studies (Heath and Stinchcombe 2014), such as those involving partner choice (Bull  
57 and Rice 1991), partner fidelity feedback (Bull and Rice 1991; Archetti *et al.* 2011) and  
58 sanctions against such invasion (Kiers *et al.* 2003).

59         Although such stabilizing mechanisms should reduce variations in partner  
60 quality in mutualistic symbiosis, thereby maintaining high-quality mutualists, variations  
61 in partner quality have been observed in diverse mutualistic relationships (Thrall *et al.*  
62 2000; Sachs *et al.* 2010;). Multiple models have been proposed to resolve this  
63 discrepancy, such as mutation–selection balance and spatiotemporally varying selection  
64 (Van Dyken *et al.* 2011; Simonsen and Stinchcombe 2014; Smith *et al.* 2014; Steidinger  
65 and Bever 2014; reviewed by Heath and Stinchcombe 2014). The mutation–selection  
66 balance is a model postulating that low-quality partners evolve via mutations but are  
67 slowly purged from populations by purifying selection. The model of spatiotemporally  
68 varying selection predicts that the fitness of a partner’s genotype varies depending on  
69 the genotype of an interacting species, such as genotype  $\times$  genotype ( $G \times G$ )  
70 interactions, on the spatially variable environment conditions ( $G \times E$  interactions) or on  
71 temporally variable selection (Denison and Kiers 2004). While these models provide

72 possible explanations for the persistence of variations in partner quality in mutualist  
73 relationships, it remains unclear how variations in partner quality arise and how they are  
74 maintained in natural populations.

75         The legume–rhizobia mutualism is an ideal model to address this question  
76 because we can manipulate genotypes of both species and reconstruct their interactions  
77 *in vitro*. To understand the origin and the maintenance of variations in partner quality at  
78 the microevolutionary scale, it is essential to quantify the quality variations among  
79 strains originated from single leguminous species and disentangle the genetic basis  
80 underlying the rhizobial quality. Although variations in rhizobial quality have been  
81 observed in multiple systems of legume–rhizobia mutualisms (e.g. *Acacia–Ensifer*,  
82 Barrett *et al.* 2015 and 2016; *Medicago–Ensifer*, Porter *et al.* 2011), most previous  
83 studies were based on a limited number of genes, and thus, the genetic basis underlying  
84 the rhizobial quality was unclear. Although Porter *et al.* (2019) and Klinger *et al.* (2016)  
85 analyzed the genetic basis of the rhizobial quality variation using genome-wide  
86 polymorphism data, these studies used a limited number of plant strains, and therefore,  
87 did not take  $G \times G$  interactions into account. Furthermore, genome-wide polymorphism  
88 data of these previous studies were based on resequencing using Illumina short-reads,  
89 making it difficult to investigate structural variations suggested to be important for  
90 plant–microbe interactions (Raffaele *et al.* 2010; Tsushima *et al.* 2019).

91         Here, we focused on the mutualism between *Lotus japonicus* (Regel) K. Larsen  
92 and their rhizobial symbionts. *Lotus japonicus* has been regarded as a model species for  
93 the understanding of plant–microbe interactions (Bamba *et al.* 2019a), and there have  
94 been extensive studies on the molecular, physiological and genomic bases of plant–  
95 rhizobia symbiosis (Handberg and Stougaard 1992; Szczyglowski *et al.* 1998; Kouchi *et*

96 *al.* 2004; Maekawa *et al.* 2009; Madsen *et al.* 2010; Suzuki *et al.* 2011; Soyano *et al.*  
97 2013; Nishida *et al.* 2016, 2018). Among *L. japonicus*-associated symbionts, full-  
98 genome sequence information is available from two strains, *Mesorhizobium japonicum*  
99 MAFF303099 and *M. loti* TONO (Kaneko *et al.* 2000; Shimoda *et al.* 2016). Bamba *et*  
100 *al.* (2019b) explored the genetic diversity of *L. japonicus*-associated symbionts, finding  
101 that *L. japonicus* in natural populations were associated with highly diverse  
102 *Mesorhizobium* bacteria. However, they used only three housekeeping and five  
103 symbiotic genes, and the detailed genomic variations of *L. japonicus*-associated  
104 symbionts are still unknown. In this study, to investigate the genomic variations of *L.*  
105 *japonicus*-associated symbionts, we first reconstructed high quality *de novo* assembled  
106 genome sequences from nine rhizobial symbionts sampled from three geographically  
107 distinct locations in Japan. Second, to quantify the rhizobial variations in partner quality  
108 including G × G interactions, we performed a cross-inoculation experiment using nine  
109 full-genome sequenced rhizobial symbionts and 15 *L. japonicus* natural accessions.  
110 Three of those *L. japonicus* accessions originated from the same locations where the  
111 nine rhizobial strains were collected, so we could explore a signature of local  
112 adaptation: i.e. native rhizobial genotypes outperform foreign rhizobial genotypes when  
113 associated with the host genotypes originating from the same locations. Finally, to infer  
114 which genomic regions were responsible for rhizobial variations in partner quality, we  
115 performed a series of analyses testing the association between genomic polymorphisms  
116 and rhizobial variations in partner quality.

## 117 MATERIALS AND METHODS

### 118 Bacterial strains

119 We used nine *L. japonicus*-associated *Mesorhizobium* strains for this study, which were  
120 previously referred to as 113-1-1, 113-3-3, 113-3-9, 131-2-1, 131-2-5, 131-3-5, L-2-11,  
121 L-8-3 and L-8-10 (Bamba *et al.* 2019b). These nine strains were sampled from three  
122 geographically distinct localities, Tottori (113-1-1, 113-3-3 and 113-3-9), Aomori (131-  
123 2-1, 131-2-5 and 131-3-5) and Miyakojima (L-2-11, L-8-3 and L-8-10) (Supporting  
124 Information Table S1), where *L. japonicus* natural accessions of the Natural  
125 BioResource Project also originated (MG50 from Tottori, MG23 from Aomori and  
126 MG20 from Miyakojima; Supporting Information Table S2). Details of the sampling  
127 localities have been described by Bamba *et al.* (2019b).

128

### 129 DNA extraction and whole-genome sequencing using MinION and Illumina HiSeq

130 Prior to DNA extraction, we cultured rhizobial strains on a tryptone yeast (TY) agar  
131 plate for 4 days at 28°C, and then picked single colonies and incubated them for 3 days  
132 at 28°C in liquid TY medium. After incubation, we precipitated the cells by  
133 centrifugation at 13,000 *g* for 3 min and rinsed them with sterilized MilliQ water  
134 (Millipore Corp., Burlington, MA, USA) twice. The genomic DNA of each rhizobial  
135 strain was extracted using a NucleoBond CB20 system (MACHERY-NAGEL GmbH &  
136 Co. KG, Düren, Germany), according to the manufacturer's instructions. The quality of  
137 genomic DNA was confirmed using agarose gel electrophoresis and a BioSpec-nano  
138 system (Shimadzu, Kyoto, Japan).

139 We performed whole-genome sequencing analyses using Oxford Nanopore  
140 Technologies (ONT) MinION and Illumina HiSeq 2500 systems. The library for ONT  
141 MinION was prepared using Rapid Barcoding kits (SQK-RBK004). We adjusted all  
142 nine libraries to the same concentration, mixed them together and then loaded them onto  
143 R9.4 flow cells. The sequencing run was performed twice on a MinION MK1b device  
144 following the NC\_48h\_Sequencing\_Run\_FLO-MIN106\_SQK-RBK004 protocol. The  
145 library preparation for Illumina HiSeq and sequencing run were performed by  
146 DNAFORM (RIKEN, Yokohama, Japan).

147

148 **Preprocessing of next-generation sequencing data, *de novo* assembly and**  
149 **annotation**

150 The ONT reads were demultiplexed with Albacore 2.2.2  
151 (<https://github.com/Albacore/albacore>), and adapter sequences were trimmed with  
152 Porechop 0.2.3 (<https://github.com/rrwick/Porechop>). The quality of demultiplexed  
153 reads was calculated with NanoStat 1.1.0 (De Coster *et al.* 2018). The ONT reads were  
154 processed with NanoFilt 2.2.0 (De Coster *et al.* 2018) to keep sequences with a q-score  
155 > 8, and the first 100 bases were removed to increase sequence quality, with a minimum  
156 sequence length of 1 kb.

157 The overall quality of the HiSeq reads was evaluated using FastQC  
158 (<http://www.bioinformatics.babraham.ac.uk/projects/fastqc/>). After confirming the lack  
159 of technical errors in the sequencing, low-quality tails were trimmed from each read  
160 using SolexaQA (Cox *et al.* 2010) with a cutoff threshold set at a q-score of 30, and  
161 reads shorter than 75 bp were filtered with PRINSEQ++ (Schmieder and Edwards,



162 2011). The Hiseq-filtered reads with pair-end relationships were repaired with BBtools  
163 (<https://sourceforge.net/projects/bbmap/>).

164 The hybrid read set (both Illumina and ONT reads) for each isolate was  
165 assembled using Unicycler 0.4.0 (Wick *et al.* 2017) in its conservative mode. Unicycler  
166 performs the assembly of the Illumina reads with SPAdes 3.12.0 (Bankevich *et al.*  
167 2012), and assembly graph scaffolds were then prepared using ONT reads. Unicycler  
168 was used to polish the final assembly of Illumina reads, and Pilon (Walker *et al.* 2014)  
169 was applied to reduce the rate of small base-level errors. The resulting assembly graph  
170 was visualized using Bandage (Wick *et al.* 2015).

171 The assembled genomes were annotated with the Rapid Annotation using  
172 Subsystem Technology (RAST) annotation server (<http://rast.theseed.org/FIG/rast.cgi>;  
173 Aziz *et al.* 2008; Brettin *et al.* 2015; Overbeek *et al.* 2014). Annotation completeness  
174 was assessed using BUSCO v3 (Rhizobiales database, Waterhouse *et al.* 2018).

175

## 176 **Comparative genomics**

177 We inferred orthologs from all nine assembled genomes and reference genomes of 15  
178 rhizobial strains (*Mesorhizobium*, *Ensifer*, *Rhizobium*, *Bradyrhizobium*, *Azorhizobium*,  
179 *Paraburkholderia* and *Cupriavidus*; Supporting Information Table S3), including both  
180 chromosomes and plasmids, using SonicParanoid with the most sensitive parameter  
181 settings (Consentino and Iwasaki 2018).

182 We extracted single-copy orthologs that were found in all nine sequenced  
183 strains and two reference strains (*M. japonicus* MAFF303099 and *M. loti* TONO).

184 Orthologous groups were assigned as genes in the core genome or in the symbiosis  
185 island based on the genome locations of the reference strain, *M. japonicus*

186 MAFF303099: coordinates of the symbiosis island were 4,643,427 [*intS*] – 5,255,770  
187 [*trnF*-GAA], and the rest was considered to be the core genome (Kaneko *et al.* 2000).  
188 We generated a multiple nucleotide sequence alignment of each single-copy orthologous  
189 group using MAFFT 7.245 (Kato and Standley 2013) with the E-INS-i algorithm, and  
190 extracted biallelic single nucleotide polymorphisms (SNPs) from the alignments.

191 To visualize the genetic variations among the nine sequenced strains, we  
192 performed principal component analyses (PCA) based on the following datasets: 1)  
193 presence/absence of orthologs, 2) the copy number variation of orthologs, 3) SNPs in  
194 the core genome and 4) SNPs in the symbiosis island. PCA was performed using the  
195 *prcomp* function implemented in R 3.6.1 (R Core Team (2019); [http://www.R-](http://www.R-project.org/)  
196 [project.org/](http://www.R-project.org/)).

197 To characterize the genome-wide pattern of polymorphisms in these nine  
198 sequenced strains, we calculated nucleotide diversity ( $\pi$  values for synonymous and  
199 nonsynonymous sites) and Tajima's *D* for each gene using MEGA-CC (Kumar *et al.*  
200 2012; Tamura *et al.* 2011).

201 To investigate the phylogenetic relationships of *L. japonicus*-associated  
202 symbionts with other nodule bacteria, phylogenetic trees of each single-copy gene were  
203 reconstructed using the maximum likelihood method with the program RAXML-NG  
204 (Kozlov *et al.* 2019), together with orthologs from reference sequences. Prior to the tree  
205 reconstruction, haplotypes were determined for each gene based on nucleotide  
206 substitutions and indels. The nucleotide substitution models were selected by the Akaike  
207 Information Criterion, as implemented in ModelTest-NG (Darriba *et al.* 2019). The  
208 single most likely tree out of 10 search replicates was saved for phylogenetic analyses.  
209 The outgroups of each phylogenetic tree were determined using the Graph Splitting

210 method (Matsui and Iwasaki 2019) based on protein sequences of each gene, under the  
211 assumption that an outgroup is the most distant operational taxonomic units from the  
212 focal group containing *L. japonicus*-associated symbionts. The sensitivity was set to 2.0  
213 in MMseqs2 (Steinegger and Söding 2017), used in the GraphSplitting method.

214 We then characterized the topologies of maximum likelihood trees of each  
215 single-copy gene based on the following criteria: 1) whether *L. japonicus*-associated  
216 symbionts (nine sequenced strains in this study, *M. japonicum* MAFF303099 and *M. loti*  
217 TONO) formed a single clade; 2) whether *Lotus*-associated symbionts (*L. japonicus*-  
218 associated symbionts, *M. loti* NZP2037 and *M. japonicum* R7A) formed a single clade;  
219 and 3) whether *Mesorhizobium* strains (nine sequenced strains in this study and other  
220 *Mesorhizobium* strains) formed a single clade. This analysis was performed using in-  
221 house scripts written in Python 3.

222 We also performed synteny analysis using the progressiveMauve 2.4.0 program  
223 (Darling *et al.* 2010) to identify any structural variations in the symbiosis islands. The  
224 symbiosis islands of each genome were first identified by aligning them with that of *M.*  
225 *japonicum* MAFF303099. We then excised the region and aligned the direction using  
226 SnapGene software (GSL Biotech; <https://www.snapgene.com>).

227

## 228 **Cross-inoculation experiments**

229 To quantify the effects of rhizobial symbionts, host plants and their interactions on plant  
230 phenotypes, we performed a cross-inoculation experiment using nine sequenced  
231 rhizobial strains (Supporting Information Table S1) and 15 *L. japonicus* natural  
232 accessions (Supporting Information Table S2), resulting in 135 combinations in total.  
233 Seeds of *L. japonicus* accessions were obtained from the Natural BioResource Project.

234 Prior to inoculation experiments, we prepared inoculant strains in the  
235 logarithmic growth phase. We cultured rhizobial strains on a TY agar plate for 4 days at  
236 28°C, and then picked single colonies and precultured them with shaking in 2 mL TY  
237 liquid media for 3 days at 28°C. Aliquots (200 µL) of precultured strains were  
238 transferred into 50 mL lots of TY liquid medium and cultured with shaking at 28°C for  
239 48 h. The cultured strains were precipitated by centrifugation at 5800 g for 3 min,  
240 washed with sterilized water three times and adjusted to  $1.0 \times 10^7$  cells/mL (based on  
241 optical density at 600 nm).

242 Partly scrubbed *L. japonicus* seeds were surface sterilized by immersion in 2%  
243 sodium hypochlorite for 3 min and rinsed three times with sterile distilled water. After  
244 overnight imbibition, the swollen seeds were sown onto 0.8% agar plates, incubated in  
245 the dark for 3 days at 20°C and then grown at 20°C under 16/8 light/dark conditions for  
246 24 h. The rooting plants were transplanted into Leonard jars (Leonard 1943) filled with  
247 300 mL sterilized vermiculite with 300 mL sterilized nitrogen-free B&D medium  
248 (Broughton and Dilworth 1971) and grown at 20°C under the same lighting conditions  
249 for 3 days. Finally, we inoculated 20 mL of each concentration-adjusted rhizobial strain  
250 into Leonard jars and grew them at 20°C under the same lighting conditions for 21 days.  
251 We then harvested whole plant bodies, imaged all individuals with a high resolution  
252 scanner and separated them into shoots and roots. The shoots were dried over 48 h at  
253 65°C, and then the dry weights were measured. For root phenotypes, we measured the  
254 numbers and areas of nodules from the scanned data. Shoot dry weight (SDW in g),  
255 number of nodules (NON), total size of nodule (NOA in mm<sup>2</sup>) and nodule size per  
256 nodule (NOA/NON ratio defined as NOAi in mm<sup>2</sup>) were obtained from all individuals  
257 used in the experiment. We repeated all inoculation experiments twice. When we grew

258 *L. japonicus* without inoculation, plants did not form any nodules and lost most of the  
259 leaves (data not shown).

260

## 261 **Data analysis of the inoculation experiments**

262 We performed analysis of variance to test whether genotypes of inoculant symbiont,  
263 those of host plants and their interactions ( $G \times G$ ) significantly influenced the four  
264 measured phenotypes (SDW, NON, NOA and NOAi). We considered mean values of  
265 each rhizobial strain (means of phenotypes of 15 plant accessions) as the rhizobial  
266 quality. To quantify  $G \times G$  interactions, we generated Euclidean distance matrices based  
267 on the phenotypic differences between rhizobial strains by using the standardized  
268 phenotypic values whose mean values of each rhizobial symbiont were set to 0, thereby  
269 controlling for bacterial genetic effects. We used mean phenotype values and Euclidean  
270 distance matrices for the following association analyses with the bacterial genome  
271 sequences. R v. 3.6.1 was used for analysis of variance (R Core Team 2019), and the  
272 Euclidean distance was calculated by using SciPy (Virtanen *et al.* 2019).

273 To determine the genomic regions associated with rhizobial quality, we first  
274 performed an SNP-based association analysis that examined the correlation between  
275 genome-wide SNPs and rhizobial quality using a linear model implemented by LIMIX  
276 (Lipert *et al.* 2014). We then performed Mantel tests to evaluate whether the genetic  
277 distance between rhizobial strains was correlated positively with the difference in the  
278 variations of rhizobial quality or those of  $G \times G$  interactions. We performed these  
279 analyses for the core genome and symbiosis islands separately to examine which  
280 genomic regions were more strongly associated with variations in rhizobial quality. For  
281 the genetic distance, kinship matrices were calculated using mixmogam (Segura *et al.*

282 2012). Mantel tests were conducted using Spearman's rank correlation implemented in  
283 the scikit-bio v. 0.5.4 (<http://scikit-bio.org/>) library of Python.

## 284 **RESULTS**

### 285 **Bacterial genome sequencing**

286 Nine rhizobial genome sequences were obtained using ONT MinION and Illumina  
287 HiSeq sequencing. From MinION sequencing, 1,011,067 reads (mean length 6748 bp)  
288 were obtained, covering a total of 6.823 Gb. After pre-processing the MinION  
289 sequences, 822,488 reads were allocated into the nine samples, which ranged from  
290 47,958 to 142,669 in read number and 370–1181 Mb in total length (Supporting  
291 Information Table S4). From HiSeq sequencing, 32,511,368 pre-processing reads were  
292 obtained and allocated into the nine samples, which ranged from 2,432,754 to 4,476,543  
293 in read number and 364–671 Mb in total length. All quality-filtered reads from both the  
294 MinION and HiSeq sequences were used for the *de novo* assembly analyses.

295

### 296 ***De novo* assembly and annotation**

297 Nearly complete assembled genomes of all nine rhizobial strains were obtained using  
298 Unicycler (Wick *et al.* 2017) by combining MinION long reads and HiSeq short reads.  
299 All nine rhizobial strains have large circular genomes, considered as chromosomes  
300 (6.652–8.451 Mb; Fig. 1 and Supporting Information Table S1). Five of the nine strains  
301 had several shorter plasmid-like circular genomes (56–654 kb), and two of the strains  
302 had short fragment sequences, which were presumably contaminants (< 10 kb fragment  
303 lengths and not closely related to *Mesorhizobium*). The total genome sizes excluding  
304 presumable contaminant fragments ranged from 7.108 to 8.451 Mb. The genome sizes  
305 of all assembled genomes were similar to that of the reference strain, *M. japonicum*  
306 MAFF303099 (chromosome, 7.036 Mb; pMLa, 0.351 Mb, pMLb, 0.251 Mb; and total  
307 7.596 Mb). All genomes without presumed contaminant fragments were used for the

308 following analyses. Gene predictions from all assembled genomes were conducted  
309 using the RAST server (Overbeek *et al.* 2014). The number of coding sequences was  
310 7173–8377, including six rRNA genes and 50–61 tRNA genes in each genome  
311 (Supporting Information Table S1). The number of coding sequences was also similar to  
312 that of *M. loti* MAFF303099 (7343 genes). The evaluation of completeness of gene  
313 prediction by BUSCO analyses showed that all nine rhizobial strains had no missing  
314 BUSCO. A few were fragmented (0.292–1.17% fragmented) and most BUSCOs were  
315 complete (98.8–99.7% complete; Supporting Information Table S1). These BUSCO  
316 analyses indicated that we had successfully reconstructed nearly complete genomes of  
317 nine rhizobial strains.

318

### 319 **Ortholog analysis**

320 The newly assembled genomes, including both chromosomes and plasmids, were  
321 compared with the reference genomes of 15 rhizobial strains (Supporting Information  
322 Table S3). We identified a total of 15,712 orthologous groups (OGs) of genes using  
323 SonicParanoid (Consentino and Iwasaki 2018). Among these OGs, 3095 were  
324 conserved among 11 *L. japonicus*-associated symbionts (*M. japonicum* MAFF303099,  
325 *M. loti* TONO and nine newly assembled genomes), and 3047 OGs were conserved  
326 among 13 *Lotus*-associated symbionts (the same 11 *L. japonicus*-associated symbionts  
327 and two *L. corniculatus*-associated symbionts, *M. japonicum* R7A and *M. loti*  
328 NZP2037).

329 We obtained 2239 OGs as single-copy orthologs found in all of nine sequenced  
330 genomes of symbionts and two reference strains (*M. japonicum* MAFF303099 and *M.*



331 *loti* TONO; Supporting Information Table S5). Seventy-six single-copy orthologs were  
332 located in symbiosis islands based on the coordinates of *M. japonicum* MAFF303099.

333 Using all the identified OGs, we investigated the presence/absence of genes  
334 present on the symbiosis islands of *M. japonicum* MAFF303099 and reported to be  
335 related to symbiotic features such as nitrogen fixation, nodulation factor assembly and  
336 protein secretion systems (Porter *et al.* 2019; Souza *et al.* 2012; Wang *et al.* 2014). All  
337 28 nitrogen fixation-related genes (*nif*, *fdx* and *fix*) were present in the nine newly  
338 assembled genomes and in other genomes of *Lotus*-associated symbionts (Fig. 2).  
339 Sixteen nodulation factor assembly genes (*nod*, *nol* and *noe* genes) were present in all  
340 nine genomes. All 14 type III protein secretion system (T3SS) genes were absent in one  
341 *L. japonicus*-associated strain (131-3-5) and in two *L. corniculatus*-associated strains;  
342 two of them (*nolB* and *nolU*) were also missing in multiple genomes of *Lotus*-associated  
343 symbionts. By contrast, one *L. japonicus*-associated strain (131-3-5) had nearly the  
344 complete set of the type IV protein secretion system (T4SS) genes that were absent in  
345 other *L. japonicus*-associated symbionts, except for the *virB7* gene.

346

### 347 **Principal component analysis (PCA)**

348 PCA showed genome-wide genetic variations between strains. When based on the  
349 presence/absence of orthologs, PC1 and PC2 explained 49.41% and 14.46%,  
350 respectively (Supporting Information Fig. S1A), When based on copy number  
351 variations, PC1 and PC2 explained 38.05% and 25.16%, respectively (Supporting  
352 Information Fig. S1B). In both plots, there were two closely related pairs of strains  
353 (131-2-5 and 131-3-5, L-8-3 and L-8-10) and no clear geographical clusters.

354 We extracted biallelic SNPs from each gene group (core genome 528,912 bp,  
355 symbiosis island: 2497 bp) and then performed PCA separately (Fig. 3A, B). PCA based  
356 on the SNPs in the core genome showed similar patterns to the one generated by  
357 genome-wide ortholog profiles (Fig. 3A); there were two closely related pairs of strains,  
358 which were also observed in the ortholog-based plot. By contrast, PCA using the SNPs  
359 of the symbiosis island showed a distinct pattern (Fig. 3B): we again found two pairs of  
360 closely related strains, but they were different from those observed in the core genome  
361 or genome-wide ortholog profiles (113-3-3 and 113-3-9, 131-2-1 and 131-2-5). Overall,  
362 PCA suggested that the pattern of relatedness between strains differed markedly  
363 between the core genome and the symbiosis island.

364

### 365 **Genome-wide view of polymorphisms and gene genealogies**

366 To understand the genome-wide landscape of polymorphisms, we calculated nucleotide  
367 diversity and Tajima's  $D$  statistic for each gene across the genome (Fig. 3C, D;  
368 Supporting Information Table S5). Genes in the core genome showed markedly higher  
369 nucleotide diversity at both synonymous and nonsynonymous sites (mean 0.4953 and  
370 0.1029, respectively) compared with those of genes on the symbiosis island (mean  
371 0.0250 and 0.006367, respectively). This pattern is consistent with an observation of the  
372 smaller number of genes in a previous study (Bamba *et al.* 2019b), and indicates a  
373 signature of horizontal gene transfer (HGT) of the symbiosis island. A steep change in  
374 diversity at the borders of the symbiosis island suggests that it would have behaved as a  
375 unit of HGT.

376 Tajima's  $D$  statistic of the core genome (mean 0.6990) was also markedly  
377 higher than that of the symbiosis island (mean  $-0.5304$ ; Fig. 3D; Supporting

378 Information Table S5). It is also important to note that Tajima's  $D$  statistic of the core  
379 genome was generally positive, indicating the excess of alleles with intermediate  
380 frequencies. This pattern would be expected if there were a clear population structure in  
381 the core genome, which was indeed observed in our PCA (Fig. 3A). By contrast,  
382 Tajima's  $D$  statistic of the symbiosis island was generally negative, indicating an excess  
383 of rare alleles in this region, and to be expected under a scenario of recent selective  
384 sweeps including HGT.

385           Patterns of phylogenetic relationships were also distinct between the core  
386 genome and the symbiosis island (Fig. 3E–G, Supporting Information Table S5). In the  
387 core genome, the majority of the gene trees (1555/2163 genes) showed a single  
388 *Mesorhizobium* clade, whereas there was no gene tree in which *L. japonicus*- or *Lotus*-  
389 associated symbionts formed a clade (Fig. 3E; Supporting Information Table S5). By  
390 contrast, in the symbiosis island, 14/76 gene trees showed the *L. japonicus*-associated  
391 symbionts clade, 55 genes formed the *Lotus*-associated symbionts clade and 14 genes  
392 showed the *Mesorhizobium* clade (Fig. 3F; Supporting Information Table S5). These  
393 results suggest that *L. japonicus*-associated symbionts mostly have the core genome of  
394 *Mesorhizobium*, but their symbiosis island clearly has a different evolutionary origin,  
395 supporting the HGT of the symbiosis island into the diverse genetic background of  
396 *Mesorhizobium*. In addition, multiple types of topologies in the symbiosis island  
397 indicated a history of recombination within the symbiosis island.

398

### 399 **Structural variations in the symbiosis island**

400 An alignment by progressiveMauve analysis (Darling *et al.* 2010) provided the genomic  
401 regions corresponding to the symbiosis island of the reference strain, *M. japonicum*

402 MAFF303099. All of the nine newly assembled genomes harbored the symbiosis island.  
403 Eight had the symbiosis island on the chromosome, but in strain 131-3-5, the symbiosis  
404 island was identified on the plasmid (Fig. 1).

405 Alignment by progressiveMauve showed that the synteny of symbiosis island  
406 of *L. japonicus*-associated symbionts was mostly conserved. Five conservative synteny  
407 blocks were identified in the symbiosis island, and all blocks were found in eight of the  
408 nine sequenced strains, except for strain 131-3-5, which lacked the whole type III  
409 protein secretion system gene cluster (*nol-hrc*). This was consistent with an ortholog  
410 search using SonicParanoid (Consentino and Iwasaki 2018), which revealed the lack of  
411 all *nol-hrc* genes (Fig. 2).

412 The largest synteny block, 21 kb away from the start positions of symbiosis  
413 islands (symbiosis islands integrase; *intS*) on *M. japonicum* MAFF303099 (Fig. 4A),  
414 contained nitrogen-fixing genes (*nif*, *fix* and *fdx*) and several nodulation genes (*nod*, *noe*  
415 and *nol*). We note that this largest block was inverted in the strain L-2-11. Between the  
416 *nif-fdx* and *nod-nol* blocks, there was a hypervariable region containing many  
417 transposase insertions (around 135 kb in *M. japonicum* MAFF303099).

418 We found that two pairs of strains harbored extremely similar symbiosis  
419 islands, even including the hypervariable region (113-3-3 and 113-3-9, 131-2-1 and  
420 131-2-5; Fig. 4B, C). The sequence identity values between 113-3-3 and 113-3-9 and  
421 between 131-2-1 and 131-2-5 were 99.6% and 99.9%, respectively. These two pairs  
422 corresponded to the pairs identified in the PCA of SNPs from the symbiosis island (Fig.  
423 3B). Because their core genomes are highly different, these data also provide strong  
424 evidence for recent HGT in the whole symbiosis island.

## 425 **Cross-inoculation experiments**

426 We performed a cross-inoculation experiment using 15 *L. japonicus* accessions and nine  
427 rhizobial symbionts, resulting in a total of 135 combinations (Supporting Information  
428 Tables S1 and S2). We obtained four phenotypes (SDW, NON, NOA and NOAi) from  
429 1189 individuals (5–14 per combination; Fig. 5). All phenotypic traits were significantly  
430 correlated with each other (Supporting Information Figs S2 and S3, all Pearson's  
431 product-moment correlation  $P < 2e^{-16}$ ). All correlation coefficients were positive (0.246  
432 to 0.637), except for that between NON and NOAi (−0.351).

433 In the cross-inoculation experiment, we detected significant effects of host,  
434 symbionts and their interactions on all four phenotypes (Table 1: all host, symbiont and  
435 interaction effects were significant at  $P < 0.001$ ). For all phenotypes, the effect of host  
436 was the largest (partial  $\eta^2 = 0.200$ – $0.268$ ), followed by the host  $\times$  symbiont interaction  
437 effect (partial  $\eta^2 = 0.145$ – $0.168$ ) and the effect of symbionts (partial  $\eta^2 = 0.038$ – $0.081$ ;  
438 Table 1), indicating that the host phenotypes were more strongly affected by host  $\times$   
439 symbiont interactions than the sole symbiont effect. Furthermore, it is worth noting that  
440 the combinations of hosts and symbionts from the same localities did not necessarily  
441 show higher phenotypic values than nonnative combinations (Supporting Information  
442 Table S6), which was not consistent with the pattern expected from local adaptation.

443 To understand what genes or genomic regions of rhizobial symbionts could be  
444 responsible for variations in partner quality, we first quantified the rhizobial quality  
445 (Supporting Information Fig. S2) and  $G \times G$  effects (Supporting Information Fig. S4).  
446 There were 1.233–1.413 times greater differences between minimum and maximum  
447 values of variations in partner quality.

448 Genes previously reported as being involved in symbiosis would be obvious  
449 candidates explaining the rhizobial variations in partner quality. Therefore, we first  
450 investigated the correlations between the variations in partner quality (represented by  
451 mean phenotypic values) and the presence/absence variations of these symbiosis genes.  
452 Analysis of variance using the genes in which we found the presence/absence variations  
453 (Fig. 2) revealed that none were significantly correlated with variations in partner  
454 quality ( $P > 0.05$ ; Supporting Information Table S7). Next, we investigated the  
455 correlation between the variations in partner quality and genetic distances of genes that  
456 were reported as candidate genes responsible for rhizobial quality (Klinger *et al.* 2016).  
457 Mantel testing using these candidate genes found that none were significantly correlated  
458 with rhizobial quality variations (Supporting Information Table S8). These results  
459 suggest that known symbiosis-related genes would not be responsible for the rhizobial  
460 variations in partner quality detected in the cross-inoculation experiment.

461 We then performed an SNP-based association analysis between rhizobial  
462 genomes and rhizobial variations in partner quality. We found that SNPs in the core  
463 genome were more strongly associated with rhizobial quality than those in the  
464 symbiosis islands (Supporting Information Fig. S5). In the linear model for SDW, NON  
465 and NOAi,  $P$  value distributions were strongly skewed toward small values in the core  
466 genome (62.6%, 70.7% and 58.5% of SNP  $P$  values were  $< 0.05$ , respectively;  
467 Supporting Information Fig. S5A–D). These skewed  $P$ -value distributions in the core  
468 genome presumably resulted from population structure and strong linkage  
469 disequilibrium. On the other hand,  $P$  value distributions were not strongly skewed in the  
470 symbiosis islands. Thus, the  $P$ -values were  $< 0.05$  in 10.8% of SDW SNPs, 5.3% of

471 NON SNPs, 11.8% of NOA SNPs and 8.8% of NOAi SNPs; Supporting Information  
472 Fig. S5E–H).

473         Next, we performed Mantel tests to determine whether the genetic distance  
474 between rhizobial strains was positively correlated with variations in partner quality.  
475 The Mantel test results between the variations of rhizobial quality for SDW and NOAi  
476 were significantly correlated with the reciprocal of rhizobial core genome kinships ( $P <$   
477  $0.05$  after Bonferroni corrections; Table 2). By contrast, we did not recognize any  
478 correlation between variations in rhizobial quality and the kinships of symbiosis islands.  
479 These results suggest that variation in the core genome, rather than in the symbiosis  
480 islands, could explain the rhizobial variations in partner quality.

481         Variations in  $G \times G$  interactions were not significantly correlated with rhizobial  
482 core genomes or symbiosis islands (Supporting Information Table S9). However, it is  
483 noteworthy that there were variations in  $G \times G$  interactions between the pairs that  
484 appeared to have almost identical symbiosis islands but highly different core genomes  
485 (Fig. 4B, C; 113-3-3 and 113-3-9; 131-2-1 and 131-2-5; Supporting Information Fig.  
486 S4). There were no significant correlations for  $G \times G$  variations between these symbiont  
487 pairs, except for NOAi of 113-3-3 and 113-3-9 ( $P < 0.05$  after Bonferroni corrections;  
488 Supporting Information Table S10). Because the symbiosis islands are nearly identical,  
489 the observed  $G \times G$  variations should due to genetic variation in the core genome.

## 490 DISCUSSION

### 491 ***De novo* assembled genomes of *Lotus japonicus*-associated nodule bacteria**

492 While there have been several attempts to sequence the whole genomes of nodule  
493 bacteria (Kaneko *et al.* 2000, 2002; Amadou *et al.* 2008; Lee *et al.* 2008; Reeve *et al.*  
494 2010ab, 2015; Ramsay *et al.* 2013; Moulin *et al.* 2014; Wang *et al.* 2014; Shimoda *et al.*  
495 2016; Nagymihály *et al.* 2017; Liang *et al.* 2018), *de novo* sequencing of multiple  
496 strains associated with a single plant species has been uncommon. Here, we performed a  
497 whole-genome sequencing analysis of nine *L. japonicus*-associated symbionts by  
498 exploiting both long-read (Oxford Nanopore MinION) and short-read (Illumina HiSeq)  
499 sequencers, which enabled us to generate high quality *de novo* assembled genomes for  
500 each strain.

501 Comparative genomic analyses of these sequenced genomes provided clear  
502 evidence for HGT of the symbiosis island. First, patterns of phylogenetic relationships  
503 were distinct between the core genome and the symbiosis island (Fig. 3E, F; Supporting  
504 Information Table S5). In the core genome, there was no gene forming an *L. japonicus*-  
505 or *Lotus*-associated symbiont clade, but in the symbiosis island, 14 and 55 of 76 genes  
506 showed *L. japonicus*- or *Lotus*-associated symbiont clades, respectively, indicating that  
507 the evolutionary origin of the symbiosis island was clearly different from that of the  
508 core genome (Fig. 3E, Supporting Information Table S5). Second, we observed a  
509 marked decline in the nucleotide diversity  $\pi$  statistic at synonymous and  
510 nonsynonymous sites and negative Tajima's *D* statistic, which are also evidence for  
511 HGT (Fig. 3C, D). A steep change in diversity at the borders of the symbiosis island  
512 suggests that it would have behaved as a unit of HGT, while the multiple topologies of



513 gene trees in the symbiosis island also indicate an evolutionary history of internal  
514 recombination events. Third, there was a pair of strains harboring almost identical  
515 sequences of the symbiosis island, but with highly distinct core genome backgrounds,  
516 which is also a signature of recent HGT (Fig. 4B, C). Including our previous study of *L.*  
517 *japonicus*-associated nodule bacteria (Bamba *et al.* 2019b), there have been several  
518 studies demonstrating HGT of symbiosis islands based on sequences of a few genes  
519 (Barcellos *et al.* 2007; Steenkamp *et al.* 2008; Menna and Hungria 2011; Koppell and  
520 Parker 2012; Parker and Rousteau 2014; Lemaire *et al.* 2015; Bamba *et al.* 2016). Thus,  
521 our *de novo* assembled genome data have provided multiple signatures of HGT at an  
522 unprecedented level of resolution.

523         The assembled genomes also revealed blocks of conserved synteny as well as  
524 extensive structural rearrangements in the symbiosis island. While Shimoda *et al.*  
525 (2016) showed that there were three conserved regions (*nif*, *nod* and type III protein  
526 secretion system) in the symbiosis islands of *Lotus*-associated symbionts, we found five  
527 conserved blocks and many rearrangements, including an inversion and loss of genes  
528 and gene clusters. As these structural rearrangements were found in the symbiosis island  
529 of bacteria associated with a single legume species, rearrangements or gene gain/loss  
530 could occur over a short time. We also found evidence of recombination within the  
531 symbiosis island based on the topologies of gene trees (Fig. 3E, F). Signatures of gene  
532 gain/loss and recombination have also been reported for several rhizobial genera  
533 (*Burkholderia*, De Meyer *et al.* 2016; *Bradyrhizobium*, Sugawara *et al.* 2013; Bouznif *et*  
534 *al.* 2019; Porter *et al.* 2019), and the genomic insight of the symbiosis island of *L.*  
535 *japonicus*-associated symbionts is consistent with the emerging perspective that

536 recombination and gene gain/loss are not rare events in rhizobial symbiosis

537 islands/plasmids (Porter *et al.* 2019).

538

### 539 **Genomic regions associated with variations in partner quality**

540 By integrating the data of cross-inoculation experiments and assembled whole genomes,

541 we investigated which genomic regions could be responsible for variations in partner

542 quality. We found that plant growth was significantly influenced by host genotypes,

543 symbiont genotypes and host  $\times$  symbiont ( $G \times G$ ) interactions (Table 1). We then

544 examined whether rhizobial variations in partner quality were explained by the

545 following genetic factors: (i) presence/absence variation of symbiosis genes, (ii) SNPs

546 in the rhizobial genomes and (iii) genetic kinships of the core genome and the symbiosis

547 island. We found that the rhizobial core genome variations explained the rhizobial

548 variations in partner quality: Mantel tests showed that the quality variations in rhizobial

549 symbionts and their core genome kinship were significantly correlated in two

550 phenotypes (SDW and NOAi; Spearman rank correlations  $P < 0.05$  after Bonferroni

551 correction; Table 2), whereas the kinship of the symbiosis island was not. In the SNP-

552 based association analyses,  $P$ -value distributions of core genomes SNPs were strongly

553 skewed toward small values (Supporting Information Fig. S5), suggesting that many

554 SNPs across the genomes are correlated with variations in partner quality, consistent

555 with the results of Mantel tests. Such strongly skewed  $P$ -value distributions possibly

556 arise from extensive genome-wide linkage disequilibrium. Bacterial genomes generally

557 show strong linkage disequilibrium given their asexual reproduction (Chen *et al.* 2015),

558 which could make it difficult to pinpoint the responsible regions/genes on the genome

559 using association-based analysis.

560 Our finding of significant correlations between core genome variations and the  
561 rhizobial variations in partner quality might partly explain why such variations persist in  
562 legume–rhizobia mutualisms. In *L. japonicus*-associated symbionts, massive genetic  
563 variations in the core genome would be maintained by recurrent HGT of the symbiosis  
564 islands into diverse *Mesorhizobium* bacterial strains (Bamba *et al.* 2019b). Local  
565 *Mesorhizobium* communities could thus serve as a source of standing genetic variation  
566 of core genomes, which might prevent variations in partner quality from fixing even  
567 under the presence of selection favoring high-quality partners: i.e. a stabilizing  
568 mechanism in mutualisms (Heath and Stinchcombe 2014). In the context of the  
569 mutation–selection balance model (Van Dyken *et al.* 2011; Smith *et al.* 2014), our study  
570 serves to illuminate the role of HGT among symbiosis islands that indirectly supply  
571 mutations in core genomes contributing to variations in partner quality.

572 A few studies have reported that variations in the symbiosis islands explain  
573 rhizobial variations in partner quality, unlike our finding in *L. japonicus*-associated  
574 bacteria (Klinger *et al.* 2016; Porter *et al.* 2019). Klinger *et al.* (2016) showed that  
575 variations in partner quality are explained by variations in the *nifH*, *nifA*, *fixC*, *nodB* and  
576 *Rleg\_4928* (*fixB*) genes. Although all these genes are present in the genomes of *L.*  
577 *japonicus*-associated symbionts (Fig. 2), genetic distances of these genes among strains  
578 and variations in rhizobial quality were not significantly correlated, suggesting that  
579 these genes do not explain the variations in partner quality in our system (Supporting  
580 Information Table S8). Porter *et al.* (2019) showed that the absence of rhizobial  
581 symbiosis genes lessens the quality of rhizobial symbionts. However, in our nine  
582 sequenced rhizobial genomes, none of the symbiotic genes showing the  
583 presence/absence of variations—all type III protein secretion system-related genes (Fig.

584 2)—were significantly correlated with rhizobial quality variations ( $P < 0.05$  after  
585 Bonferroni correction; Supporting Information Table S7). We note that type III protein  
586 secretion system-related genes might not be involved in interactions between *L.*  
587 *japonicus* and *Mesorhizobium* because dysfunctional mutants of such genes in *M.*  
588 *japonicum* did not show phenotypic changes in terms of nodule-forming ability for *L.*  
589 *japonicus* B129 (Okazaki *et al.* 2010), although their effects have been detected in other  
590 *Lotus* species (Okazaki *et al.* 2010; Mercante *et al.* 2015).

591 We speculate that the contrasting findings between our study and previous ones  
592 might have arisen in part from differences in sampling schemes and in the unique  
593 history of *L. japonicus*-associated symbionts. Both Klinger *et al.* (2016) and Porter *et al.*  
594 (2019) focused on rhizobial populations harboring similar core genomes. Porter *et al.*  
595 (2019) used 38 strains possessing a similar core genome as a recombining population,  
596 and Klinger *et al.* (2016) analyzed strains collected from nitrogen-enriched  
597 experimental fields, and the nucleotide diversity of their core genomes was as low as  
598 that of the symbiosis islands. By contrast, data compilation by Bamba *et al.* (2019b)  
599 revealed that one of the notable characteristics of the *L. japonicus*-associated rhizobia in  
600 Japan is the presence of highly diverse core genomes and the extremely low nucleotide  
601 diversity of the symbiosis island. This possibly reflects recent and recurrent HGT of the  
602 symbiosis island associated with the population expansion of *L. japonicus* into the Japan  
603 archipelago over several thousand years (Bamba *et al.* 2019b). Therefore, it is possible  
604 that the symbiosis islands of *L. japonicus*-associated bacteria analyzed in this study  
605 have experienced genetic bottlenecks when *L. japonicus* migrated into the Japan  
606 archipelago and are too homogeneous to serve as a source for variations in partner  
607 quality.

608

609 **G × G interactions and local adaptation**

610 In our cross-inoculation experiment, we found that plant growth was significantly  
611 influenced by host × symbiont (G × G) interactions, even more than symbiont genotypes  
612 (Table 1), as is also observed in a few other symbiosis systems (Heath and Tiffin 2007;  
613 Barrett *et al.* 2016). Such G × G interactions are suggested to underlie the selective  
614 explanations for the persistence of variations in partner quality in mutualisms (Heath  
615 and Stinchcombe, 2014), and our cross-inoculation experimental results support this  
616 scenario.

617 We found complex G × G interactions even between two rhizobial pairs sharing  
618 almost identical symbiosis islands (113-3-3 vs. 113-3-9; 131-2-1 vs. 131-2-5; Fig. 4B, C  
619 and Supporting Information Fig. S4), strongly suggesting that such variations have  
620 arisen in part from variations in rhizobial core genomes. Previous studies on G × G  
621 interactions in legume–rhizobia mutualisms used relatively few genes, so it remained  
622 unclear which genes/genomic regions were responsible for such interactions (Heath and  
623 Tiffin 2007; Barret *et al.* 2015;). Here, we provide clear evidence supporting the  
624 contribution of rhizobial core genome variations. However, we did not observe  
625 statistically significant correlations between the variations in G × G interactions and  
626 rhizobial genomic variations based on the Mantel test (Supporting Information Table  
627 S9). While G × G interactions should have a genetic basis (Table 1), they might be  
628 governed by polygenic factors that would not be detectable at our relatively small  
629 experimental scale (15 rhizobia × 9 legume combinations).

630 Such G × G interactions in a spatial context have been a hotly debated issue in  
631 legume–rhizobia mutualisms (Heath and Tiffin 2007; Heath 2010; Porter *et al.* 2011;

632 Heath *et al.* 2012; Ehinger *et al.* 2014; Harrison *et al.* 2017). The geographic mosaic  
633 theory of coevolution states that the outcome of reciprocal selection between a  
634 particular genotype of one species and a genotype of an interacting species will differ  
635 among ecologically distinct locations (Thompson 1994, 1997, 2005; Forde *et al.* 2004;  
636 Decaestecker *et al.* 2007; Laine *et al.* 2014;). According to this theory, if legume–  
637 rhizobia mutualistic interactions coevolve locally, native rhizobial genotypes are  
638 expected to outperform foreign rhizobial genotypes when associated with host  
639 genotypes originating from the same locations. In our experiments, the NOA and SDW  
640 data can be considered fitness proxies (Ratcliff *et al.* 2012; Younginger *et al.* 2017), but  
641 the combinations of hosts and symbionts from the same localities did not show higher  
642 phenotypic values in either of them (Supporting Information Table S6), which is not  
643 consistent with the pattern expected from local adaptation. As is also discussed for the  
644 maintenance of variations in partner quality, recurrent HGT of the symbiosis islands  
645 into diverse *Mesorhizobium* core genomes might explain in part the absence of local  
646 adaptations in the *L. japonicus* associated-symbionts, given that core genome variations  
647 are strongly correlated with rhizobial variations in partner quality. With local and  
648 recurrent HGT of symbiosis islands, core genome variations underlying variations in  
649 partner quality might be prevented from fixation even under the presence of local  
650 reciprocal selection between plants and rhizobia. By integrating the full-genome  
651 sequencing of rhizobial strains and cross-inoculation experiments, this study has  
652 demonstrated a scenario of how variations in partner quality could be maintained in the  
653 presence of selection and HGT of symbiosis islands. More genetic studies from a plant  
654 perspective would be valuable for the understanding of coevolution between plants and  
655 rhizobia. This has now become possible for *L. japonicus*, where full-genome

656 resequenced data have become available for hundreds of natural accessions (Shah *et al.*

657 2020).

658 **ACKNOWLEDGMENTS**

659 Wild accessions of *L. japonicus* used in this research were provided by the National  
660 BioResource Project “Lotus/Glycine” of the Ministry of Education, Culture, Sports,  
661 Science and Technology, Japan.

662

663 **FUNDING**

664 This work was supported by a Research Fellowship from the Japan Society for the  
665 Promotion of Science for Young Scientists [17J04284 to MB], JSPS KAKENHI [grant  
666 number 19H03271 to TT]; Ministry of Education, Culture, Sports, Science and  
667 Technology (KAKENHI) [grant numbers 17H05833, 18H04813, and 19H04851 to TT];  
668 the Sumitomo Foundation research grant [161380 to TT].

669



670 **REFERENCES**

- 671 Amadou C, Mangenot S, Glew M *et al.* Genome sequence of the  $\beta$ -rhizobium  
672 *Cupriavidus taiwanensis* and comparative genomics of rhizobia. *Genome Res*  
673 2008;18:1472–83.
- 674 Archetti M, Scheuring I, Hoffman M *et al.* Economic game theory for mutualism and  
675 cooperation. *Ecol Lett* 2011;14:1300–12.
- 676 Aziz RK, Bartels D, Best A *et al.* The RAST Server: Rapid annotations using  
677 subsystems technology. *BMC Genomics* 2008;9:1–15.
- 678 Bamba M, Nakata S, Aoki S *et al.* Wide distribution range of rhizobial symbionts  
679 associated with pantropical sea-dispersed legumes. *Antonie Van Leeuwenhoek*  
680 2016;109:1605–14.
- 681 Bamba M, Kawaguchi YW, Tsuchimatsu T. Plant adaptation and speciation studied by  
682 population genomic approaches. *Dev Growth, Differ* 2019a;61:12–24.
- 683 Bamba M, Aoki S, Kajita T *et al.* Exploring Genetic Diversity and Signatures of  
684 Horizontal Gene Transfer in Nodule Bacteria Associated with *Lotus japonicus* in  
685 Natural Environments. *Mol Plant-Microbe Interact* 2019b;32:1110–20.
- 686 Bankevich A, Nurk S, Antipov D *et al.* SPAdes: A new genome assembly algorithm and  
687 its applications to single-cell sequencing. *J Comput Biol* 2012;19:455–77.
- 688 Barcellos FG, Menna P, Batista JS *et al.* Evidence of horizontal transfer of symbiotic  
689 genes from a *Bradyrhizobium japonicum* inoculant strain to indigenous diazotrophs

690 *Sinorhizobium (Ensifer) fredii* and *Bradyrhizobium elkanii* in a Brazilian savannah  
691 soil. *Appl Environ Microbiol* 2007;73:2635–43.

692 Barrett LG, Bever JD, Bissett A *et al.* Partner diversity and identity impacts on plant  
693 productivity in *Acacia*-rhizobial interactions. *J Ecol* 2015;103, DOI:  
694 10.1111/1365-2745.12336.

695 Barrett LG, Zee PC, Bever JD *et al.* Evolutionary history shapes patterns of mutualistic  
696 benefit in *Acacia*-rhizobial interactions. *Evolution* 2016;70:1473–85.

697 Bouznif B, Guefrachi I, Rodríguez de la Vega RC *et al.* Phylogeography of the  
698 *Bradyrhizobium* spp. Associated With Peanut, *Arachis hypogaea*: Fellow Travelers  
699 or New Associations? *Front Microbiol* 2019;10:1–13.

700 Brettin T, Davis JJ, Disz T *et al.* RASTtk: A modular and extensible implementation of  
701 the RAST algorithm for building custom annotation pipelines and annotating  
702 batches of genomes. *Sci Rep* 2015;5, DOI: 10.1038/srep08365.

703 Broughton WJ, Dilworth MJ. Control of leghaemoglobin synthesis in snake beans.  
704 *Biochem J* 1971;125:1075–80.

705 Bull JJ, Rice WR. Distinguishing mechanisms for the evolution of co-operation. *J Theor*  
706 *Biol* 1991;149:63–74.

707 Chen PE, Shapiro BJ. The advent of genome-wide association studies for bacteria. *Curr*  
708 *Opin Microbiol* 2015;25:17–24.

- 709 Cosentino S, Iwasaki W. SonicParanoid: Fast, accurate and easy orthology inference.  
710 *Bioinformatics* 2019;35:149–51.
- 711 Cox MP, Peterson DA, Biggs PJ. SolexaQA: At-a-glance quality assessment of Illumina  
712 second-generation sequencing data. *BMC Bioinformatics* 2010;11:485.
- 713 Darling AE, Mau B, Perna NT. Progressivemauve: Multiple genome alignment with  
714 gene gain, loss and rearrangement. *PLoS One* 2010;5, DOI:  
715 10.1371/journal.pone.0011147.
- 716 Darriba D, Posada D, Kozlov AM *et al.* ModelTest-NG: A New and Scalable Tool for  
717 the Selection of DNA and Protein Evolutionary Models. *Mol Biol Evol* 2019, DOI:  
718 10.1093/molbev/msz189.
- 719 De Coster W, D’Hert S, Schultz DT *et al.* NanoPack: Visualizing and processing long-  
720 read sequencing data. *Bioinformatics* 2018;34:2666–9.
- 721 De Meyer SE, Briscoe L, Martínez-Hidalgo P *et al.* Symbiotic *Burkholderia* species  
722 show diverse arrangements of *nif/fix* and *nod* genes and lack typical High-Affinity  
723 cytochrome *cbb3* Oxidase genes. *Mol Plant-Microbe Interact* 2016;29:609–19.
- 724 Decaestecker E, Gaba S, Raeymaekers JAM *et al.* Host-parasite “Red Queen” dynamics  
725 archived in pond sediment. *Nature* 2007;450:870–3.
- 726 Denison RF, Toby Kiers E. Why are most rhizobia beneficial to their plant hosts, rather  
727 than parasitic? *Microbes Infect* 2004;6:1235–9.

- 728 Ehinger M, Mohr TJ, Starcevich JB *et al.* Specialization-generalization trade-off in a  
729 *Bradyrhizobium* symbiosis with wild legume hosts. *BMC Ecol* 2014;14:8.
- 730 Forde SE, Thompson JN, Bohannan BJM. Adaptation varies through space and time in  
731 a coevolving host-parasitoid interaction. *Nature* 2004;431:841–4.
- 732 Frederickson ME. Rethinking mutualism stability: cheaters and the evolution of  
733 sanctions. *Q Rev Biol* 2013;88:269–95.
- 734 Ghoul M, Griffin AS, West SA. Toward an evolutionary definition of cheating.  
735 *Evolution (N Y)* 2014;68:318–31.
- 736 Handberg K, Stougaard J. *Lotus japonicus* , an autogamous, diploid legume species for  
737 classical and molecular genetics. *Plant J* 1992;2:487–96.
- 738 Harrison TL, Wood CW, Heath KD *et al.* Geographically structured genetic variation in  
739 the *Medicago lupulina*–*Ensifer* mutualism. *Evolution (N Y)* 2017;71:1787–801.
- 740 Heath KD. Intergenomic epistasis and coevolutionary constraint in plants and rhizobia.  
741 *Evolution (N Y)* 2010;64:1446–58.
- 742 Heath KD, Burke P V., Stinchcombe JR. Coevolutionary genetic variation in the  
743 legume-rhizobium transcriptome. *Mol Ecol* 2012;21:4735–47.
- 744 Heath KD, Stinchcombe JR. Explaining mutualism variation: a new evolutionary  
745 paradox? *Evolution* 2014;68:309–17.

- 746 Heath KD, Tiffin P. Context dependence in the coevolution of plant and rhizobial  
747 mutualists. *Proc R Soc B* 2007;274:1905–12.
- 748 Hubber A, Vergunst AC, Sullivan JT *et al.* Symbiotic phenotypes and translocated  
749 effector proteins of the *Mesorhizobium loti* strain R7A VirB/D4 type IV secretion  
750 system. *Mol Microbiol* 2004;54:561–74.
- 751 Kaneko T, Nakamura Y, Sato S *et al.* Complete genome structure of the nitrogen-fixing  
752 symbiotic bacterium *Mesorhizobium loti*. *DNA Res* 2000;7:381–406.
- 753 Kaneko T, Nakamura Y, Sato S *et al.* Complete genomic sequence of nitrogen-fixing  
754 symbiotic bacterium *Bradyrhizobium japonicum* USDA110. *DNA Res* 2002;9:189–  
755 97.
- 756 Katoh K, Standley DM. MAFFT Multiple Sequence Alignment Software Version 7:  
757 Improvements in Performance and Usability. *Mol Biol Evol* 2013;30:772–80.
- 758 Kiers ET, Rousseau RA, West SA *et al.* Host sanctions and the legume–rhizobium  
759 mutualism. *Nature* 2003;425:78–81.
- 760 Klinger CR, Lau JA, Heath KD. Ecological genomics of mutualism decline in nitrogen-  
761 fixing bacteria. *Proc R Soc B* 2015;283.
- 762 Koppell JH, Parker M a. Phylogenetic clustering of *Bradyrhizobium* symbionts on  
763 legumes indigenous to North America. *Microbiology* 2012;158:2050–9.

- 764 Kouchi H, Shimomura K, Hata S *et al.* Large-scale analysis of gene expression profiles  
765 during early stages of root nodule formation in a model legume, *Lotus japonicus*.  
766 *DNA Res* 2004;11:263–74.
- 767 Kozlov AM, Darriba D, Flouri T *et al.* RAxML-NG: a fast, scalable and user-friendly  
768 tool for maximum likelihood phylogenetic inference. *Bioinformatics* 2019:1–5.
- 769 Kumar S, Stecher G, Peterson D *et al.* MEGA-CC: Computing core of molecular  
770 evolutionary genetics analysis program for automated and iterative data analysis.  
771 *Bioinformatics* 2012;28:2685–6.
- 772 Laine AL, Burdon JJ, Nemri A *et al.* Host ecotype generates evolutionary and  
773 epidemiological divergence across a pathogen metapopulation. *Proc R Soc B Biol*  
774 *Sci* 2014;281, DOI: 10.1098/rspb.2014.0522.
- 775 Lee KB, De Backer P, Aono T *et al.* The genome of the versatile nitrogen fixer  
776 *Azorhizobium caulinodans* ORS571. *BMC Genomics* 2008;9:1–14.
- 777 Lemaire B, Van Cauwenberghe J, Chimphango S *et al.* Recombination and horizontal  
778 transfer of nodulation and ACC deaminase (*acdS*) genes within Alpha- and  
779 Betaproteobacteria nodulating legumes of the Cape Fynbos biome. *FEMS*  
780 *Microbiol Ecol* 2015;91:1–11.
- 781 Leonard LT. A simple assembly for use in the testing of cultures of rhizobia. *J Bacteriol*  
782 1943;45:523.

- 783 Liang J, Hoffrichter A, Brachmann A *et al.* Complete genome of *Rhizobium*  
784 *leguminosarum* Norway, an ineffective *Lotus* micro-symbiont. *Stand Genomic Sci*  
785 2018;13:1–11.
- 786 Lippert C, Casale FP, Rakitsch B *et al.* LIMIX: genetic analysis of multiple traits.  
787 *bioRxiv* 2014:003905.
- 788 Madsen LH, Tirichine L, Jurkiewicz A *et al.* The molecular network governing nodule  
789 organogenesis and infection in the model legume *Lotus japonicus*. *Nat Commun*  
790 2010;1, DOI: 10.1038/ncomms1009.
- 791 Maekawa T, Maekawa-Yoshikawa M, Takeda N *et al.* Gibberellin controls the  
792 nodulation signaling pathway in *Lotus japonicus*. *Plant J* 2009;58:183–94.
- 793 Matsui M, Iwasaki W. Graph Splitting: A Graph-Based Approach for Superfamily-  
794 Scale Phylogenetic Tree Reconstruction. *Syst Biol* 2019;0:1–15.
- 795 Menna P, Hungria M. Phylogeny of nodulation and nitrogen-fixation genes in  
796 *Bradyrhizobium*: Supporting evidence for the theory of monophyletic origin, and  
797 spread and maintenance by both horizontal and vertical transfer. *Int J Syst Evol*  
798 *Microbiol* 2011;61:3052–67.
- 799 Mercante V, Duarte CM, Sánchez CM *et al.* The absence of protein Y4yS affects  
800 negatively the abundance of T3SS *Mesorhizobium loti* secretin, RhcC2, in bacterial  
801 membranes. *Front Plant Sci* 2015;6:1–12.

- 802 Moulin L, Klonowska A, Caroline B *et al.* Complete Genome sequence of *Burkholderia*  
803 *phymatum* STM815T, a broad host range and efficient nitrogen-fixing symbiont of  
804 *Mimosa* species. *Stand Genomic Sci* 2015;9:763–74.
- 805 Nagymihály M, Vázarhelyi BM, Barrière Q *et al.* The complete genome sequence of  
806 *Ensifer meliloti* strain CCMM B554 (FSM-MA), a highly effective nitrogen-fixing  
807 microsymbiont of *Medicago truncatula* Gaertn. *Stand Genomic Sci* 2017;12:1–9.
- 808 Nishida H, Handa Y, Tanaka S *et al.* Expression of the *CLE-RS3* gene suppresses root  
809 nodulation in *Lotus japonicus*. *J Plant Res* 2016;129:909–19.
- 810 Nishida H, Tanaka S, Handa Y *et al.* A NIN-LIKE PROTEIN mediates nitrate-induced  
811 control of root nodule symbiosis in *Lotus japonicus*. *Nat Commun* 2018;9:1–14.
- 812 Okazaki S, Okabe S, Higashi M *et al.* Identification and functional analysis of type III  
813 effector proteins in *Mesorhizobium loti*. *Mol Plant-Microbe Interact* 2010;23:223–  
814 34.
- 815 Overbeek R, Olson R, Pusch GD *et al.* The SEED and the Rapid Annotation of  
816 microbial genomes using Subsystems Technology (RAST). *Nucleic Acids Res*  
817 2014;42:206–14.
- 818 Parker M a., Rousteau A. Mosaic origins of *Bradyrhizobium* legume symbionts on the  
819 Caribbean island of Guadeloupe. *Mol Phylogenet Evol* 2014;77:110–5.



- 820 Porter SS, Faber-Hammond J, Montoya AP *et al.* Dynamic genomic architecture of  
821 mutualistic cooperation in a wild population of *Mesorhizobium*. *ISME J*  
822 2019;13:301–15.
- 823 Porter SS, Stanton ML, Rice KJ. Mutualism and adaptive divergence: Co-invasion of a  
824 heterogeneous grassland by an exotic legume-rhizobium symbiosis. *PLoS One*  
825 2011;6, DOI: 10.1371/journal.pone.0027935.
- 826 R Core Team R: A language and environment for statistical computing. 2019.
- 827 Raffaele S, Farrer RA, Cano LM *et al.* Genome evolution following host jumps in the  
828 irish potato famine pathogen lineage. *Science (80- )* 2010;330:1540–3.
- 829 Ramsay JP, Major AS, Komarovskiy VM *et al.* A widely conserved molecular switch  
830 controls quorum sensing and symbiosis island transfer in *Mesorhizobium loti*  
831 through expression of a novel antiactivator. *Mol Microbiol* 2013;87:1–13.
- 832 Ratcliff WC, Underbakke K, Denison RF. Measuring the fitness of symbiotic rhizobia.  
833 *Symbiosis* 2011;55:85–90.
- 834 Reeve W, Chain P, O’Hara G *et al.* Complete genome sequence of the *Medicago*  
835 microsymbiont *Ensifer (Sinorhizobium) medicae* strain WSM419. *Stand Genomic*  
836 *Sci* 2010a;2:77–86.
- 837 Reeve W, O’Hara G, Chain P *et al.* Complete genome sequence of *Rhizobium*  
838 *leguminosarum* bv *trifolii* strain WSM2304, an effective microsymbiont of the

- 839 South American clover *Trifolium polymorphum*. *Stand Genomic Sci* 2010b;2:66–  
840 76.
- 841 Reeve W, Sullivan J, Ronson C *et al.* High-Quality draft genome sequence of the *Lotus*  
842 spp. microsymbiont *Mesorhizobium loti* strain CJ3Sym. *Stand Genomic Sci*  
843 2015;10:54.
- 844 Sachs JL, Ehinger MO, Simms EL. Origins of cheating and loss of symbiosis in wild  
845 *Bradyrhizobium*. *J Evol Biol* 2010;23:1075–89.
- 846 Schmieder R, Edwards R. Quality control and preprocessing of metagenomic datasets.  
847 *Bioinformatics* 2011;27:863–4.
- 848 Segura V, Vilhjálmsson BJ, Platt A *et al.* An efficient multi-locus mixed-model  
849 approach for genome-wide association studies in structured populations. *Nat Genet*  
850 2012;44:825–30.
- 851 Shah N, Wakabayashi T, Kawamura Y *et al.* Extreme genetic signatures of local  
852 adaptation during *Lotus japonicus* colonization. *Nat Commun* 2020;11, DOI:  
853 10.1038/s41467-019-14213-y |.
- 854 Shimoda Y, Hirakawa H, Sato S *et al.* Whole-Genome Sequence of the Nitrogen-Fixing  
855 Symbiotic Rhizobium *Mesorhizobium loti* Strain TONO. *Genome Announc*  
856 2016;4:e01016-16.

- 857 Simonsen AK, Stinchcombe JR. Standing genetic variation in host preference for  
858 mutualist microbial symbionts. *Proc R Soc B Biol Sci* 2014;281, DOI:  
859 10.1098/rspb.2014.2036.
- 860 Smith J, Van Dyken JD, Velicer GJ. Nonadaptive processes can create the appearance  
861 of facultative cheating in microbes. *Evolution (N Y)* 2014;68:816–26.
- 862 Souza RC, Del Rosario Quispe Saji G, Costa MO *et al.* AtlasT4SS: A curated database  
863 for type IV secretion systems. *BMC Microbiol* 2012;12, DOI: 10.1186/1471-2180-  
864 12-172.
- 865 Soyano T, Kouchi H, Hirota A *et al.* NODULE INCEPTION Directly Targets *NF-Y*  
866 Subunit Genes to Regulate Essential Processes of Root Nodule Development in  
867 *Lotus japonicus*. *PLoS Genet* 2013;9, DOI: 10.1371/journal.pgen.1003352.
- 868 Steenkamp ET, Stepkowski T, Przymusiak A *et al.* Cowpea and peanut in southern  
869 Africa are nodulated by diverse *Bradyrhizobium* strains harboring nodulation genes  
870 that belong to the large pantropical clade common in Africa. *Mol Phylogenet Evol*  
871 2008;48:1131–44.
- 872 Steidinger BS, Bever JD. The coexistence of hosts with different abilities to  
873 discriminate against cheater partners: An evolutionary game-theory approach. *Am*  
874 *Nat* 2014;183:762–70.
- 875 Steinegger M, Söding J. MMseqs2 enables sensitive protein sequence searching for the  
876 analysis of massive data sets. *Nat Biotechnol* 2017;35:1026–8.

- 877 Sugawara M, Epstein B, Badgley BD *et al.* Comparative genomics of the core and  
878 accessory genomes of 48 *Sinorhizobium* strains comprising five genospecies.  
879 *Genome Biol* 2013;14:R17.
- 880 Suzuki A, Suriyagoda L, Shigeyama T *et al.* *Lotus japonicus* nodulation is  
881 photomorphogenetically controlled by sensing the red/far red (R/FR) ratio through  
882 jasmonic acid (JA) signaling. *Proc Natl Acad Sci* 2011;108:16837–42.
- 883 Szczyglowski K, Shaw RS, Wopereis J *et al.* Nodule organogenesis and symbiotic  
884 mutants of the model legume *Lotus japonicus*. *Mol Plant-Microbe Interact*  
885 1998;11:684–97.
- 886 Tamura K, Battistuzzi FU, Billing-Ross P *et al.* Estimating divergence times in large  
887 molecular phylogenies. *Proc Natl Acad Sci U S A* 2012;109:19333–8.
- 888 Thompson JN. Evaluating the dynamics of coevolution among geographically  
889 structured populations. *Ecology* 1997;78:1619–23.
- 890 Thompson JN. *The Coevolutionary Process*. University of Chicago Press, 1994.
- 891 Thompson JN. Coevolution: The Geographic Mosaic of Coevolutionary Arms Races.  
892 *2Current Biol* 2005;15:R9920-R994.
- 893 Thrall PH, Burdon JJ, Woods MJ. Variation in the effectiveness of symbiotic  
894 associations between native rhizobia and temperate Australian legumes:  
895 Interactions within and between genera. *J Appl Ecol* 2000;37:52–65.

- 896 Tsushima A, Gan P, Kumakura N *et al.* Genomic plasticity mediated by transposable  
897 elements in the plant pathogenic fungus *Colletotrichum higginsianum*. *Genome*  
898 *Biol Evol* 2019;11:1487–500.
- 899 Van Dyken JD, Linksvayer TA, Wade MJ. Kin selection-mutation balance: A model for  
900 the origin, maintenance, and consequences of social cheating. *Am Nat*  
901 2011;177:288–300.
- 902 Virtanen P, Gommers R, Oliphant TE *et al.* SciPy 1.0--Fundamental Algorithms for  
903 Scientific Computing in Python. 2019:1–22.
- 904 Walker BJ, Abeel T, Shea T *et al.* Pilon: An integrated tool for comprehensive  
905 microbial variant detection and genome assembly improvement. *PLoS One* 2014;9,  
906 DOI: 10.1371/journal.pone.0112963.
- 907 Wang S, Hao B, Li J *et al.* Whole-genome sequencing of *Mesorhizobium huakuii*  
908 7653R provides molecular insights into host specificity and symbiosis island  
909 dynamics. *BMC Genomics* 2014;15:1–17.
- 910 Waterhouse RM, Seppey M, Simao FA *et al.* BUSCO applications from quality  
911 assessments to gene prediction and phylogenomics. *Mol Biol Evol* 2018;35:543–8.
- 912 Wick RR, Judd LM, Gorrie CL *et al.* Completing bacterial genome assemblies with  
913 multiplex MinION sequencing. *Microb Genomics* 2017:1–7.
- 914 Wick RR, Schultz MB, Zobel J *et al.* Bandage: Interactive visualization of de novo  
915 genome assemblies. *Bioinformatics* 2015;31:3350–2.

- 916 Younginger BS, Sirová D, Cruzan MB *et al.* Is Biomass a Reliable Estimate of Plant  
917 Fitness? *Appl Plant Sci* 2017;5:1600094.

918 **Table 1.** ANOVAs for growth and nodulation of plants in the inoculum treatments.

|                  | d.f. | SDW <sup>a</sup> | NON <sup>b</sup> | NOA <sup>c</sup> | NOAi <sup>d</sup> |
|------------------|------|------------------|------------------|------------------|-------------------|
| Host             | 14   | 0.244***         | 0.228***         | 0.268***         | 0.200***          |
| Inoculant        | 8    | 0.093***         | 0.048***         | 0.038***         | 0.081***          |
| Host x Inoculant | 112  | 0.161***         | 0.168***         | 0.145***         | 0.162***          |

<sup>a</sup> Shoot dry weight, <sup>b</sup> Number of nodules, <sup>c</sup> Total size of nodules, and <sup>d</sup> Nodule size per one nodule.

Numerators indicate degree of freedom for d.f and partial  $\eta^2$  for each phenotype

An asterisk (\*\*\*) indicates significance at  $P < 0.001$

**Table 2.** Mantel test between partner quality variations and kinships of rhizobial genomes

|      | Core <sup>a</sup>        |                      | Sym <sup>b</sup>         |                      |
|------|--------------------------|----------------------|--------------------------|----------------------|
|      | Coefficient <sup>a</sup> | P-value <sup>b</sup> | Coefficient <sup>a</sup> | P-value <sup>b</sup> |
| SDW  | 0.6561                   | 0.0240               | 0.1788                   | 1.0000               |
| NON  | 0.6556                   | 0.0560               | -0.0821                  | 1.0000               |
| NOA  | 0.1030                   | 1.0000               | 0.0729                   | 1.0000               |
| NOAi | 0.9333                   | 0.0008               | 0.0361                   | 1.0000               |

<sup>a</sup>Numerators indicate Spearman's rank correlation coefficient.

<sup>b</sup>Numerators indicate P-value after the Bonferroni correction

919



920 **FIGURES**

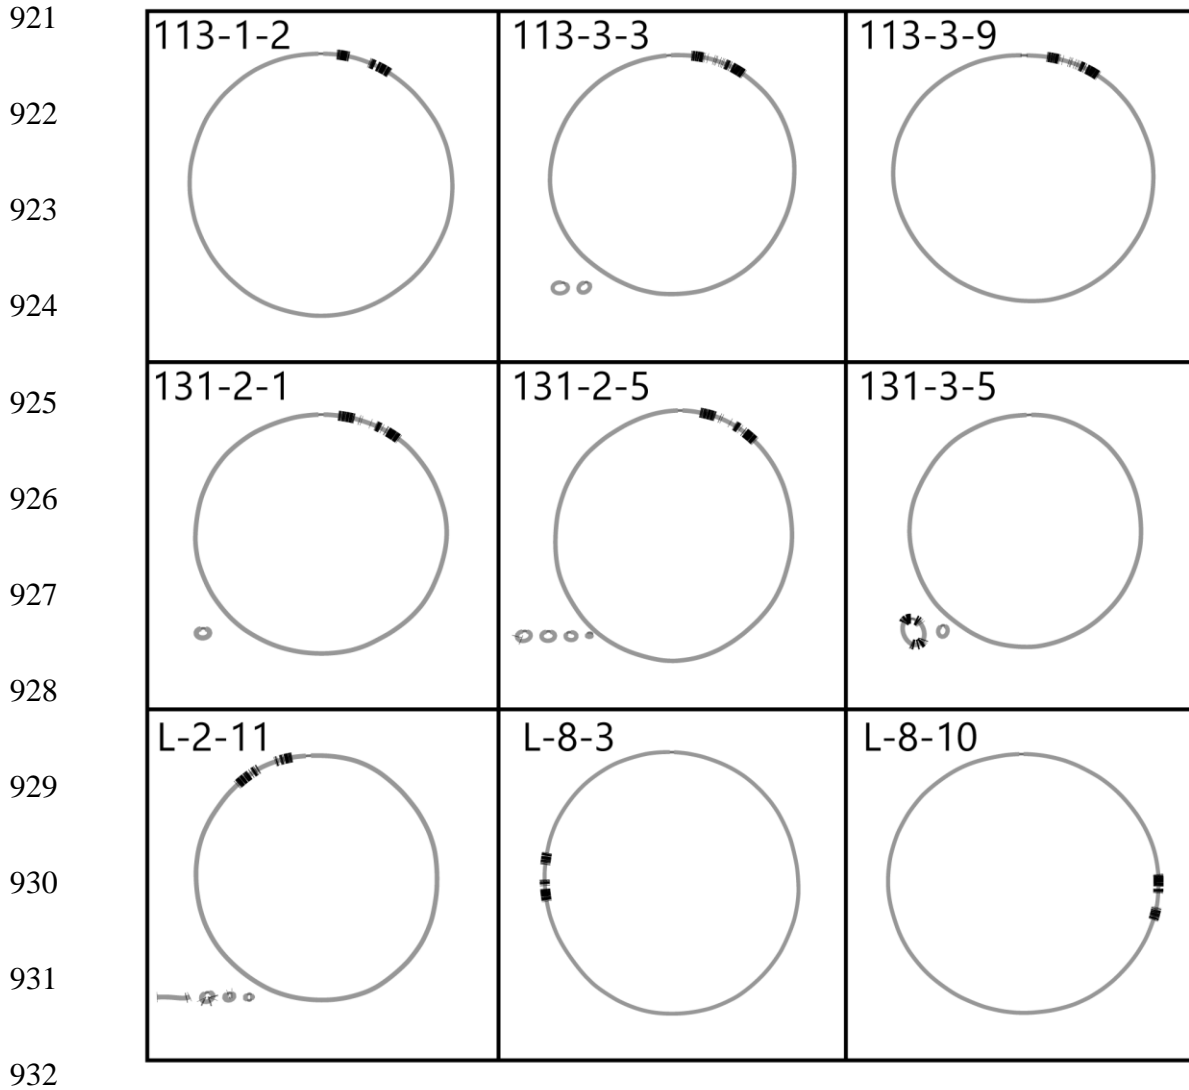

933 **Figure 1.** Assembly graphs of nine newly assembled rhizobial genomes. Gray circles  
934 and bars indicate assembled genomes. Thick black bars on the genomes indicate genes  
935 identified as homologs of genes on the symbiosis island of the reference strain, *M.*  
936 *japonicum* MAFF303099.

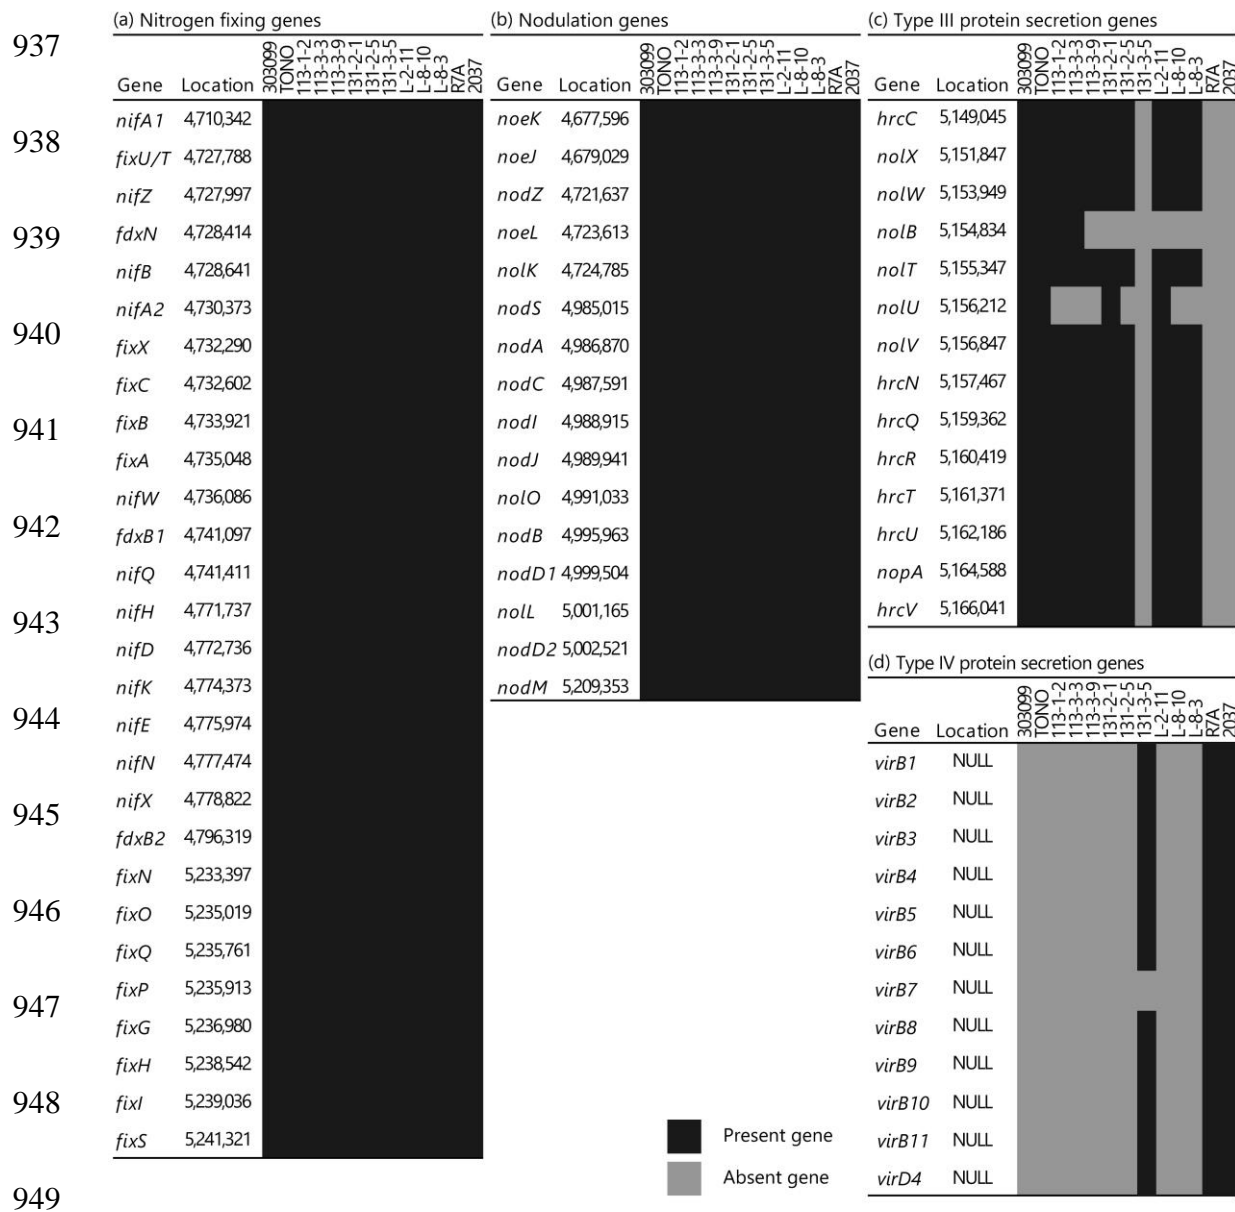

950 **Figure 2.** Presence/absence of variations among genes reported to be related to the  
 951 symbiosis: (a) nitrogen-fixing genes; (b) nodulation genes; (c) type III protein secretion  
 952 system genes; and (d) type IV protein secretion system genes. Each row indicates  
 953 rhizobial strains with abbreviations as follows: 303099, *M. japonicum* MAFF303099;  
 954 TONO, *M. loti* TONO; R7A, *M. japonicum* R7A; and 2037, *M. loti* NZP2037. Black  
 955 and gray cells indicate the presence or absence of genes, respectively.

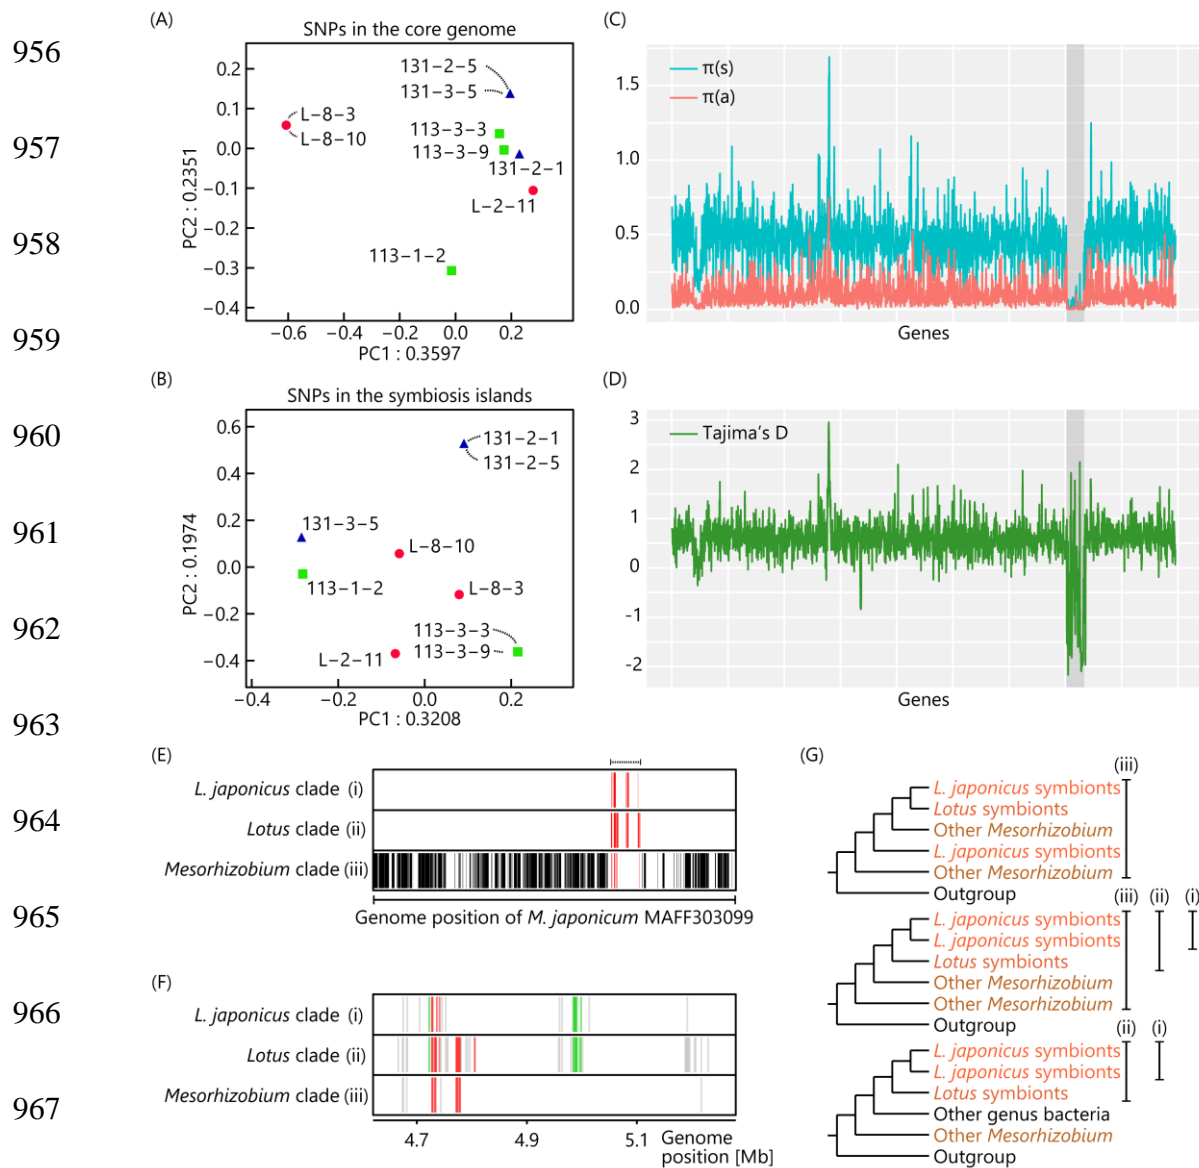

969 **Figure 3.** Genomic outlines of nine sequenced strains. (A, B) Principal component  
 970 analyses of nine sequenced strains using single nucleotide polymorphisms (SNPs) in the  
 971 core genome (A) and in the symbiosis island (B). Forms and colors of dots indicate  
 972 sampling localities of each rhizobial symbiont with the strain type designated in  
 973 brackets: blue triangle, Aomori (131); green square, Tottori (113); and red circle,  
 974 Miyakojima (L). (C, D) Genome-wide distribution of nucleotide diversity statistics  $\pi$   
 975 (C) and Tajima's  $D$  (D), calculated for each single-copy gene described in Supporting

976 Information Table S4. The order of genes was based on the genome assembly of *M.*  
977 *japonicum* MAFF303099. The shaded region indicates the symbiosis island. (C) Red  
978 and blue lines indicate the nucleotide diversity statistic  $\pi$  at nonsynonymous and  
979 synonymous sites, respectively. (E, F and G) Comparison of phylogenetic tree  
980 topologies in the rhizobial whole genomes (E) and the symbiosis island (F). Bars are  
981 indicated if: (i) *L. japonicus*-associated symbionts (nine sequenced strains, *M.*  
982 *japonicum* MAFF303099 and *M. loti* TONO) form a single clade; (ii) *Lotus*-associated  
983 symbionts (*L. japonicus*-associated symbionts and *M. loti* NZP2037, and *M. japonicum*  
984 R7A) form a single clade; and (iii) *Mesorhizobium* strains (nine sequenced strains in  
985 this study and other *Mesorhizobium* strains) form a single clade. (E) The black and red  
986 bars indicate genes on the core genome and the symbiosis island, respectively. (F) Each  
987 red, green and gray bar indicates nitrogen-fixing, nodulation and unknown genes. (G)  
988 Schematic trees showing clades satisfying criteria i–iii listed above.

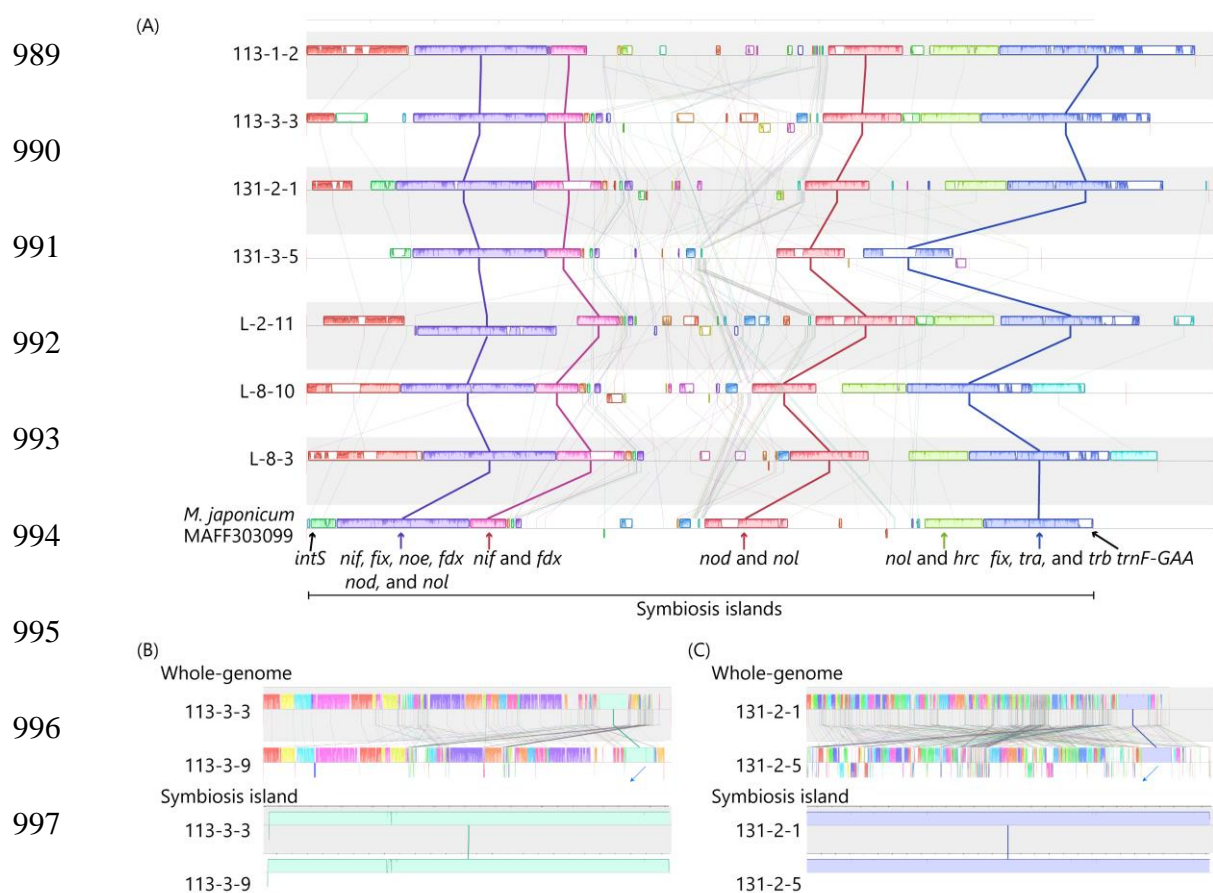

999 **Figure 4.** An alignment of the symbiosis islands of *L. japonicus*-associated symbionts,  
 1000 using progressiveMauve software. Bordered and connected boxes indicate similar  
 1001 sequence compositions among sequences. (A) The boxes connected by bold lines  
 1002 indicate conservative genetic clusters among all *L. japonicus*-associated symbionts. The  
 1003 purple and pink/purple conserved blocks, red conserved block and blue and yellow  
 1004 conserved blocks are referred as *nif*-*fdx* blocks, *nod* blocks and *nol*-*hrc* blocks in the  
 1005 main text, respectively. (B, C) Alignment of two pairs of rhizobial strains harboring  
 1006 almost identical symbiosis islands, 113-3-3 and 113-3-9 (B) and 131-2-1 and 131-2-5  
 1007 (C), generated by progressiveMauve software. The upper and lower diagrams show  
 1008 alignments of whole genomes and the symbiosis islands, respectively. Boxes connected  
 1009 by bold lines indicate the symbiosis islands.

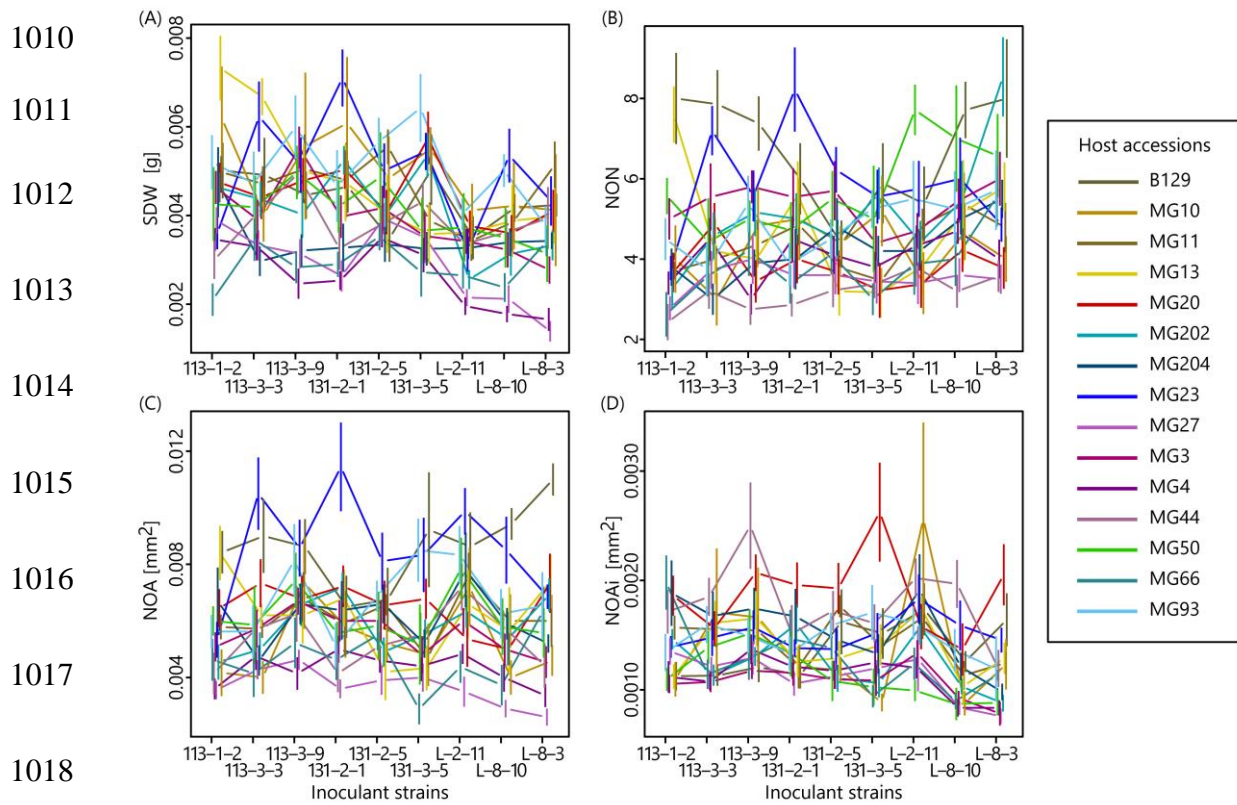

1019 **Figure 5.** Plant phenotypes of the cross-inoculation experiments, (A) shoot dry weight  
1020 (SDW), (B) nodule numbers (NON), (C) total nodule size (NOA), (D) nodule size per  
1021 nodule (NOAi). Mean values and standard errors (bars) are shown.

1022 **SUPPLEMENTARY FIGURES**

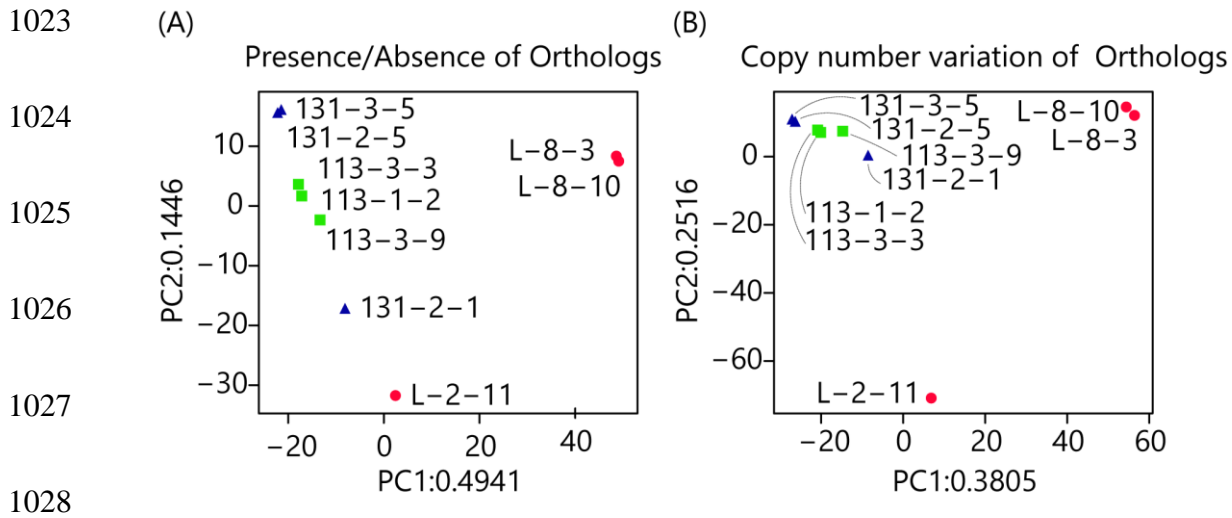

1029 **Figure S1.** Principal component analysis (PCA) results of nine sequenced strains using  
1030 ortholog profiles. (A) PCA based on the presence/absence of orthologs. (B) PCA based  
1031 on copy number variations. Forms and colors of dots indicate the sampling localities of  
1032 each rhizobial symbiont with the strain type designated in brackets: blue triangle,  
1033 Aomori (131); green square, Tottori (113); and red circle, Miyakojima (L).

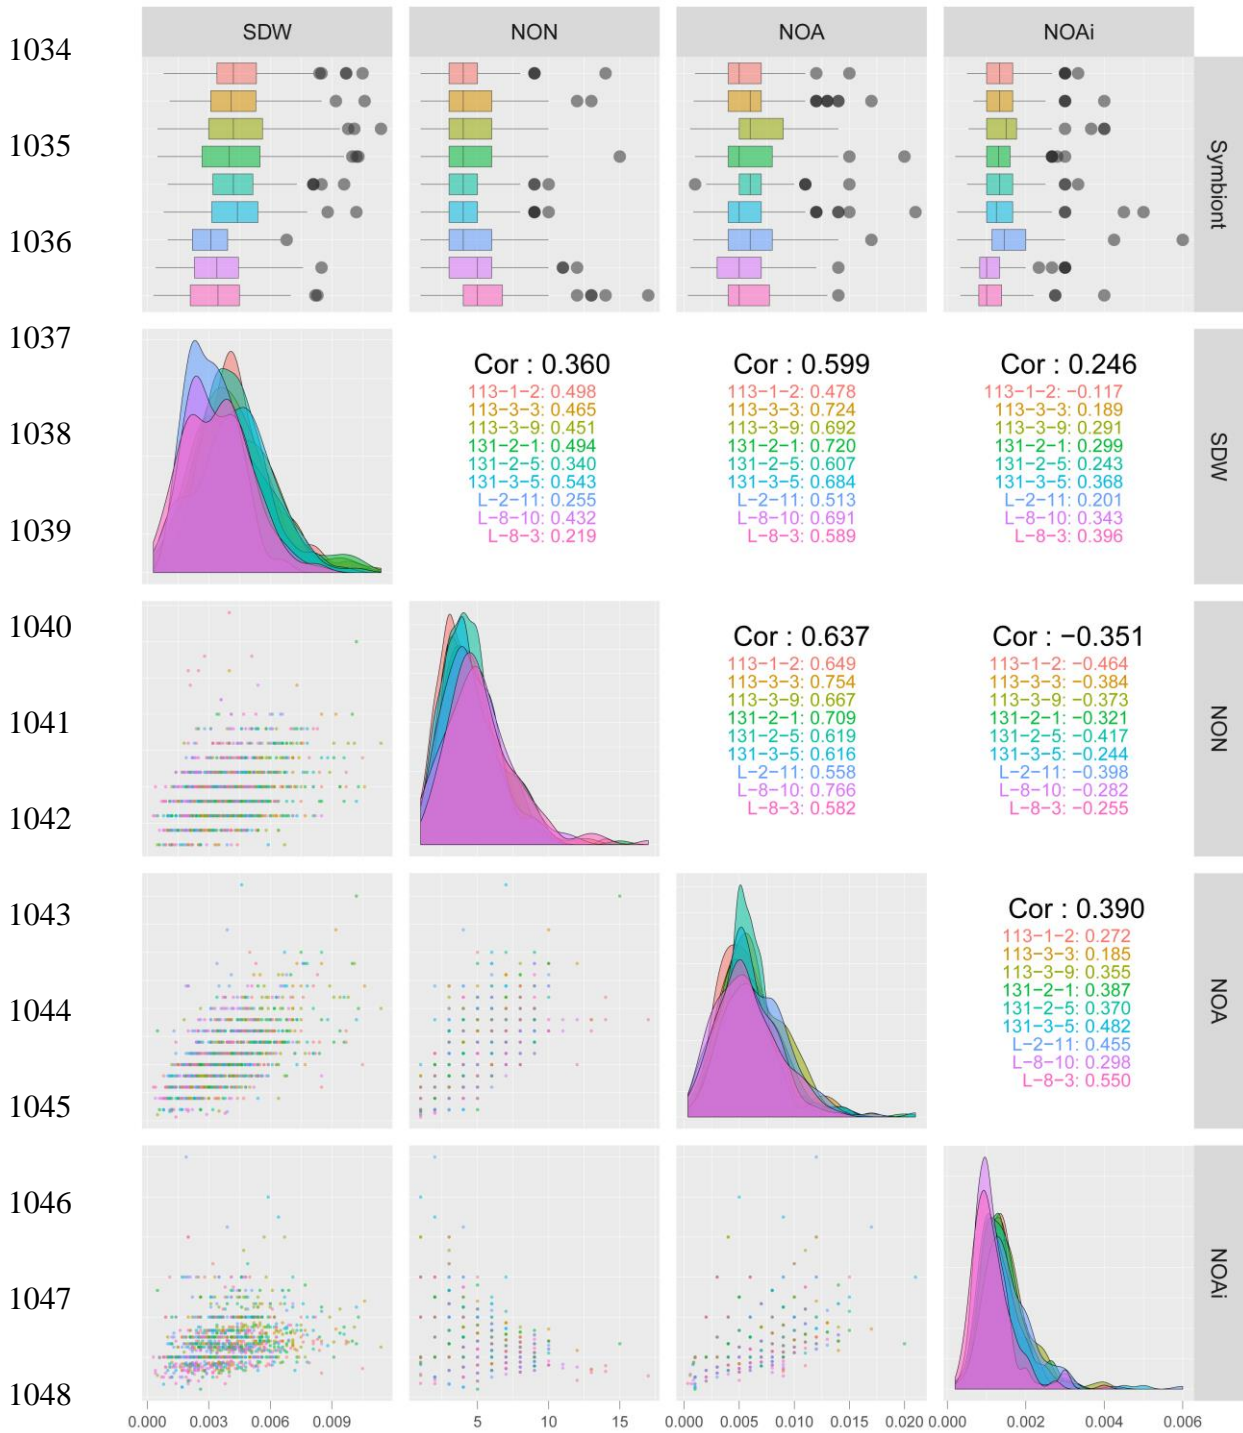

1049 **Figure S2.** Correlations of phenotypes in rhizobial symbionts. Box plots show the  
 1050 distribution of phenotypic values for each rhizobial symbiont, and horizontal grey bars  
 1051 indicate the mean values. The x- and y-axes in each scatterplot represent phenotypic  
 1052 trait values: SDW, NON, NOA and NOAi. The diagonal plots are density curves for the



1053 individual points and Pearson's correlation coefficients are given for all phenotypes

1054 (Cor; black). Each color indicates one rhizobial symbiont.

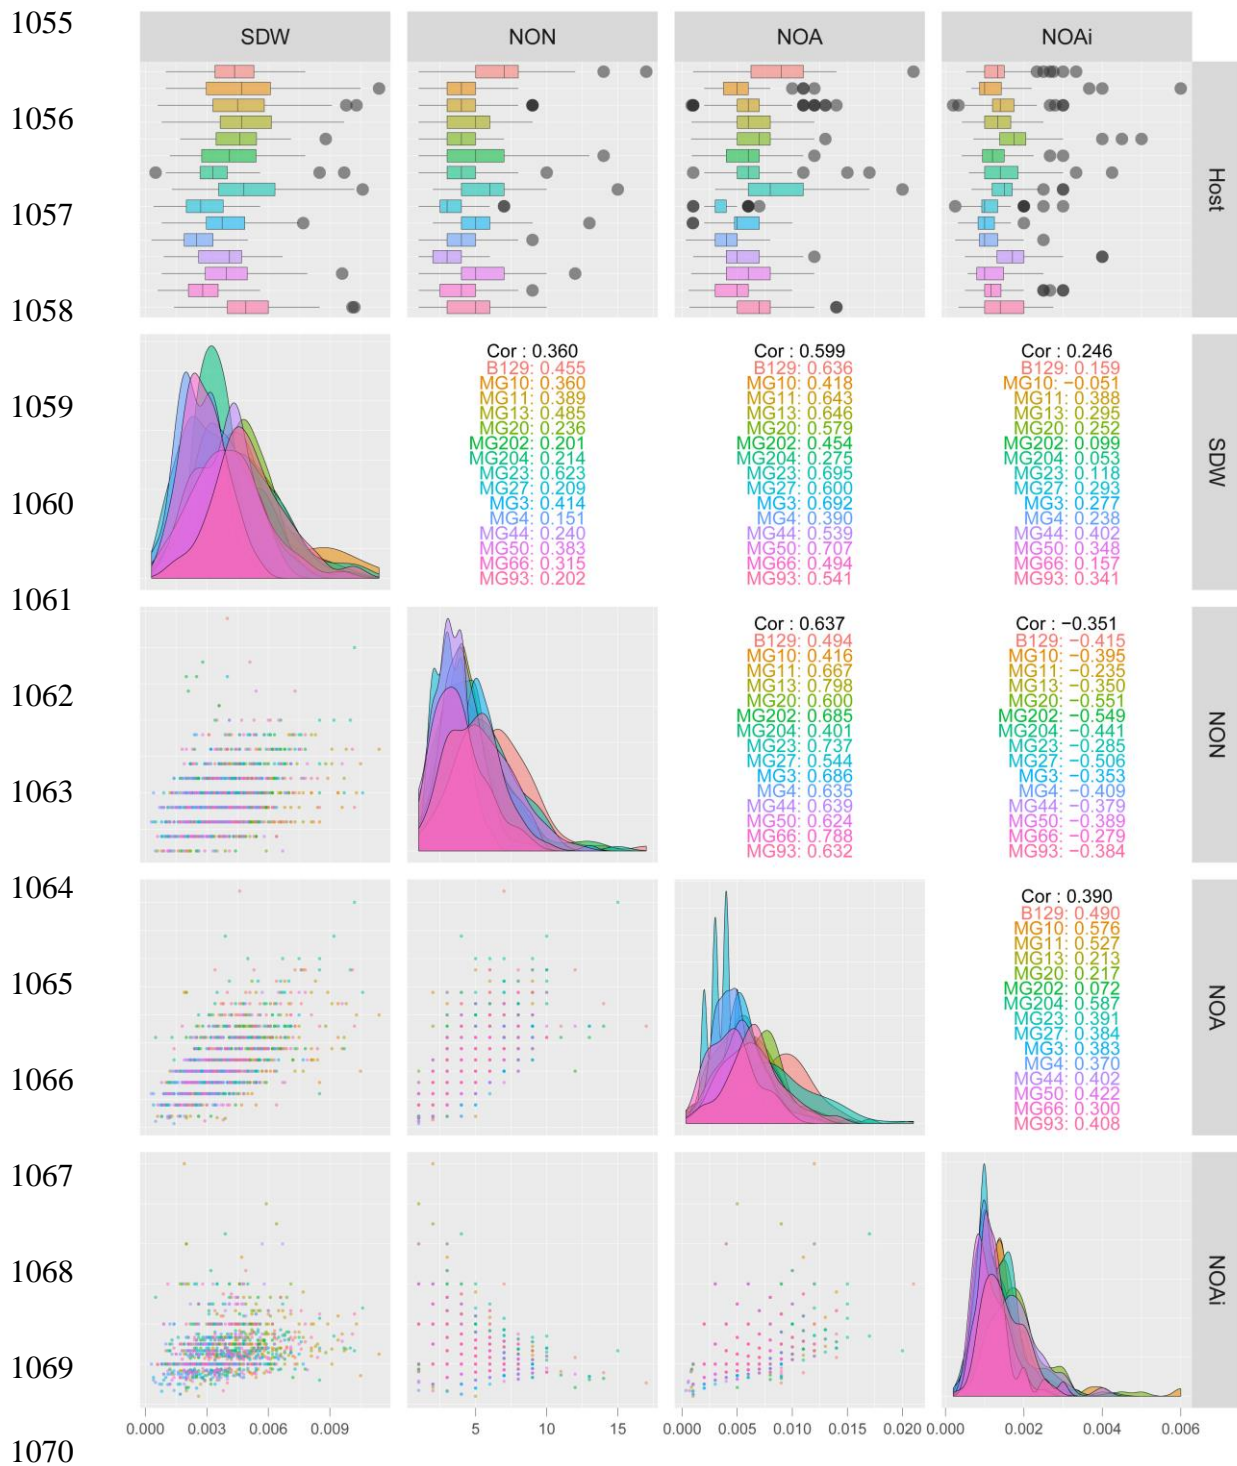

1071 **Figure S3.** Correlations of phenotypes in *L. japonicus* accessions. Box plots show the  
 1072 distribution of phenotypic values for each accession, and horizontal grey bars indicate  
 1073 the mean values. The x- and y-axes in each scatterplot represent phenotypic trait values:

- 1074 SDW, NON, NOA and NOAi. The diagonal plots are density curves for the individual  
1075 points and Pearson's correlation coefficients are given for all phenotypes (Cor; black).  
1076 Each color indicates one *L. japonicus* accession.

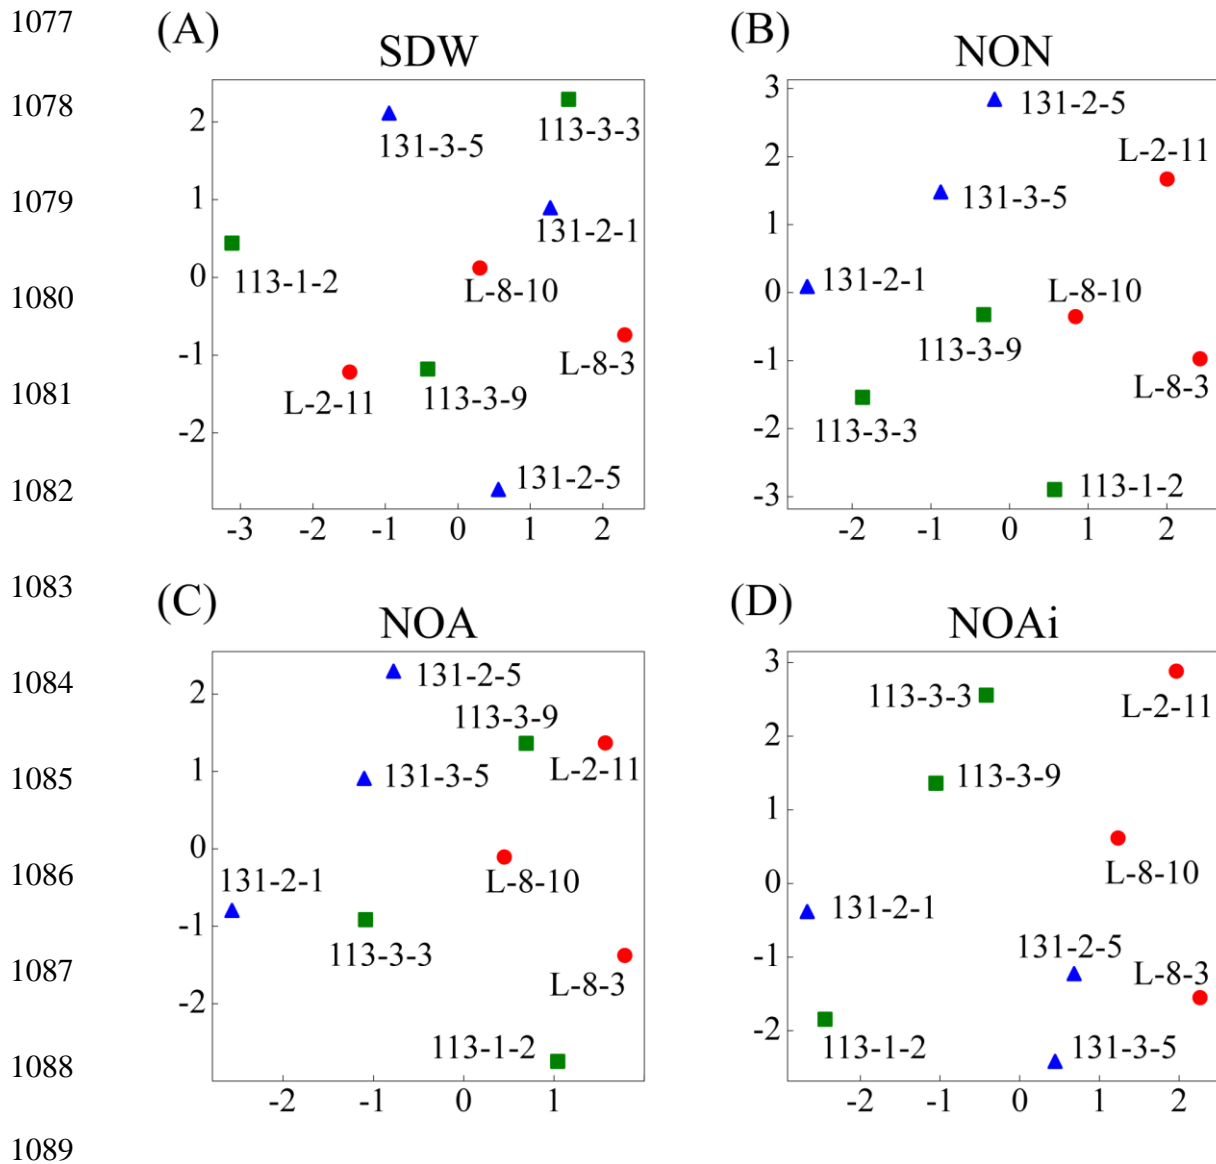

1090 **Figure S4.** Non-metric multidimensional scaling of variations in  $G \times G$  interactions of  
 1091 rhizobial symbionts: (A), SDW; (B), NON; (C), NOA; and (D), NOAi. Forms and  
 1092 colors of dots indicate sampling localities of each rhizobial symbiont with the strain  
 1093 type designated in brackets: blue triangle, Aomori (131); green square, Tottori (113);  
 1094 and red circle: Miyakojima (L).

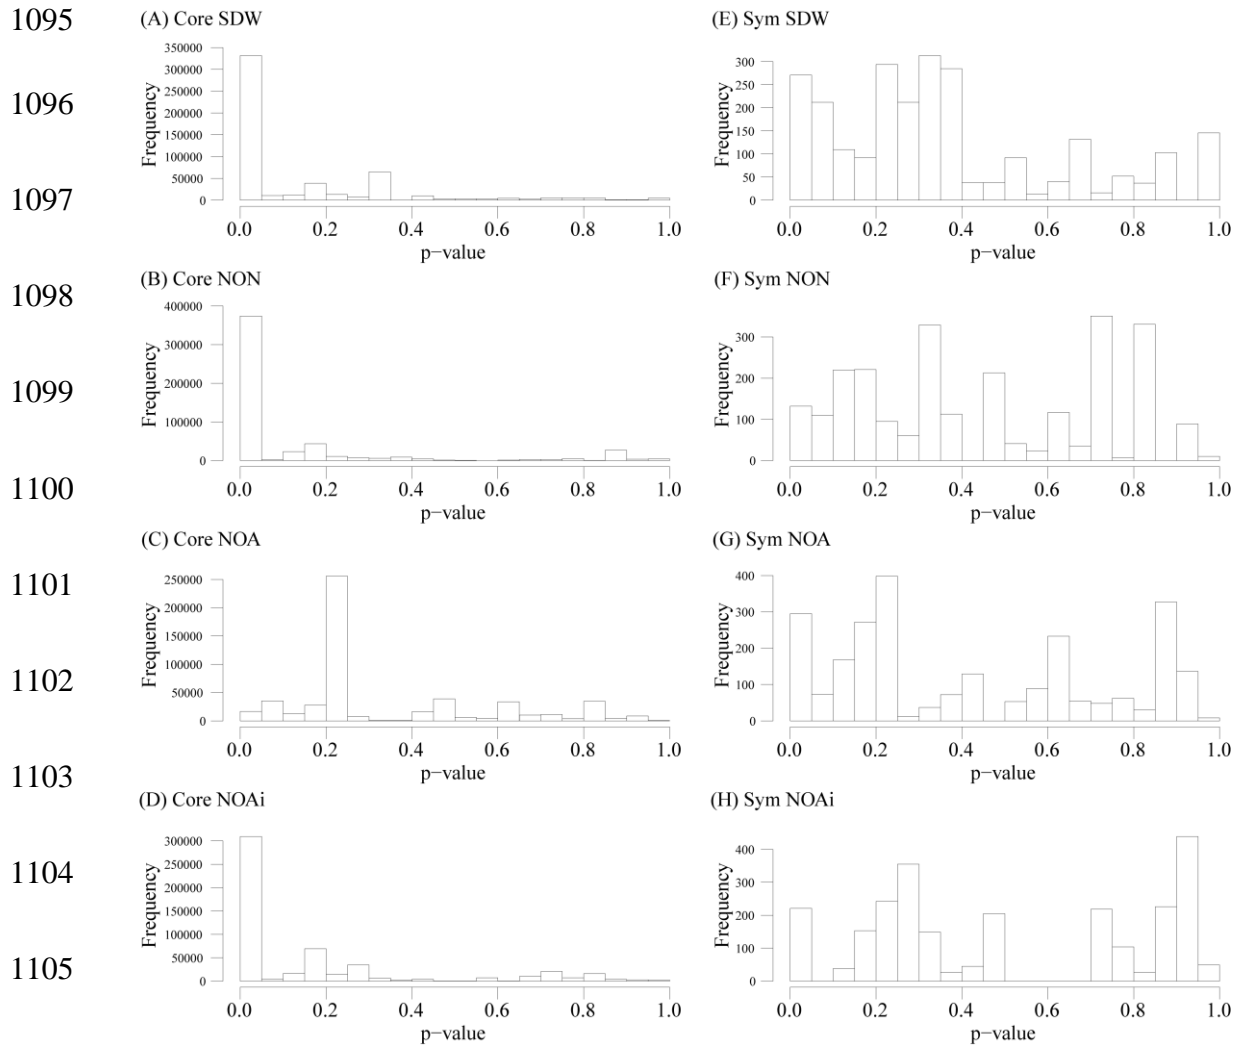

1107 **Figure S5.** *P*-value distributions of correlations between variations in partner quality of  
1108 each phenotype and the SNPs of the core genomes (A–D) and their symbiosis islands  
1109 (E–H).

1110 **SUPPLEMENTAL FILES**

1111 **Supplemental Table 1:** Summary of de novo assembly

1112 **Supplemental Table 2:** List of host accessions

1113 **Supplemental Table 3:** List of reference genomes

1114 **Supplemental Table 4:** Summary of next-generation sequencing data

1115 **Supplemental Table 5:** List of single copy orthologs

1116 **Supplemental Table 6:** Results of TukeyHSD test

1117 **Supplemental Table 7:** Results of ANOVAs 1

1118 **Supplemental Table 8:** Results of ANOVAs 2

1119 **Supplemental Table 9:** Results of Mantel test 1

1120 **Supplemental Table 10:** Results of Mantel test 2

1121
